# Supplementary material for: Utility of Routine Laboratory Biomarkers to Detect COVID-19: A Systematic Review and Meta-Analysis
Source: MDPI journal article supplement (doi:10.3390/v13050803), 2021-04-30

## S5: Statistical analysis

Results of random-effects meta-analysis examining the pooled prevalence of combined COVID-19 positive and COVID-19 negative patients or healthy individuals (control) are presented here as a) forest plot, b) sensitivity analysis forest plot for studies with low risk of bias, c) sensitivity analysis forest plot for published studies and d) funnel plot depicting publication bias with the overall risk of bias.

### White blood cell count, x 109/L

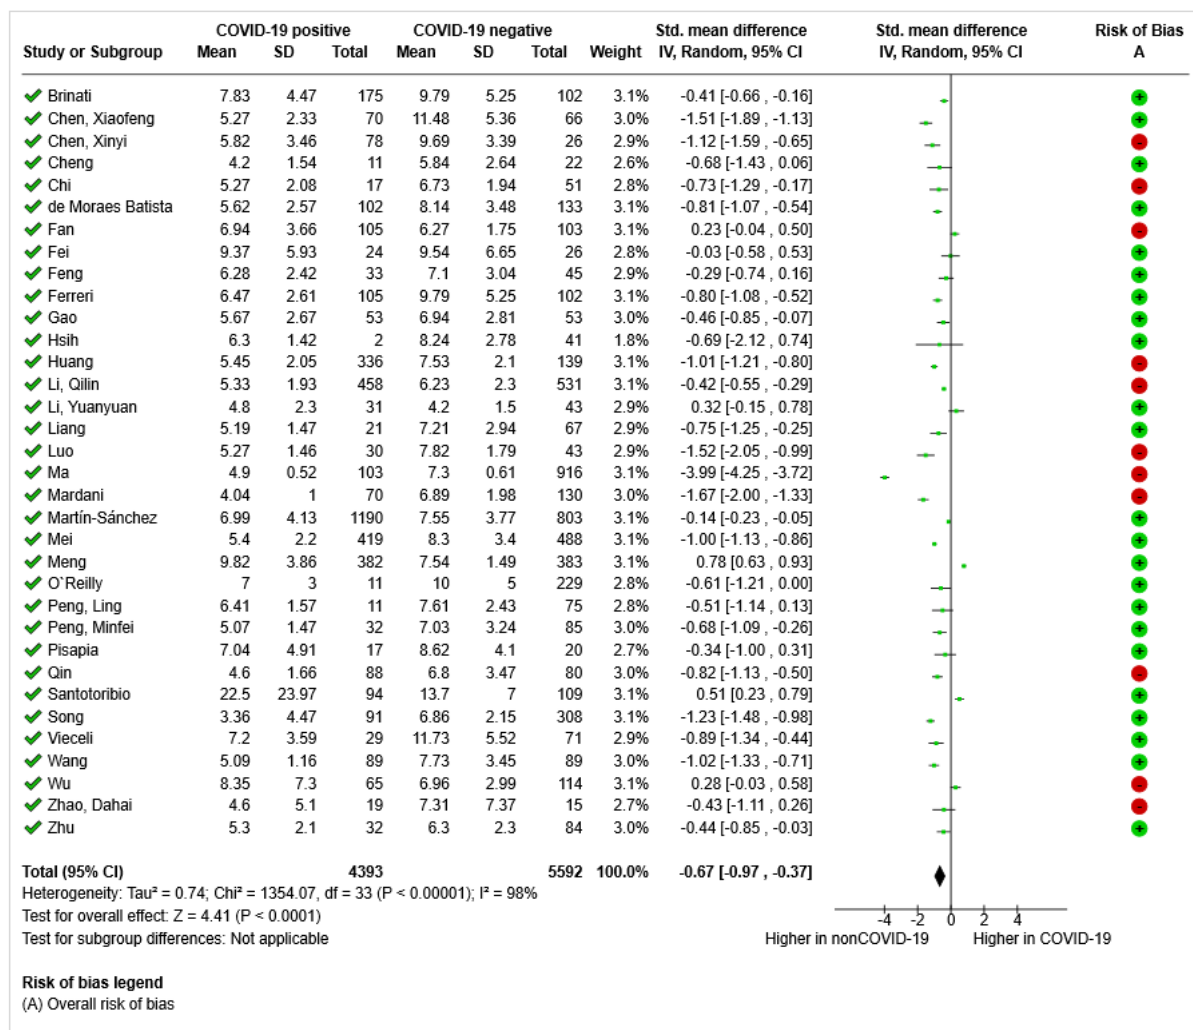

## Sensitivity analysis – low risk of bias studies

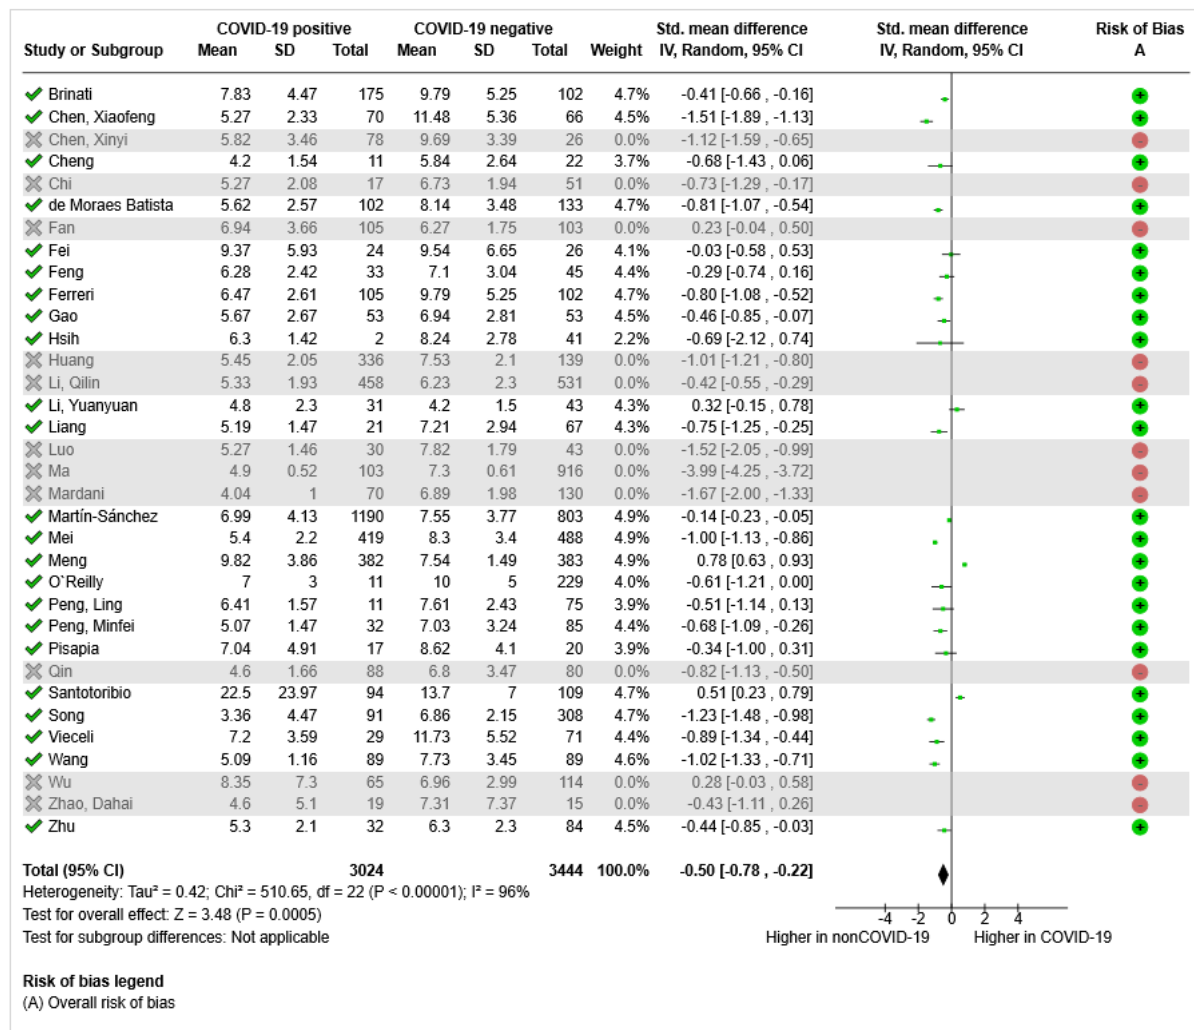

## Publication bias - funnel plot

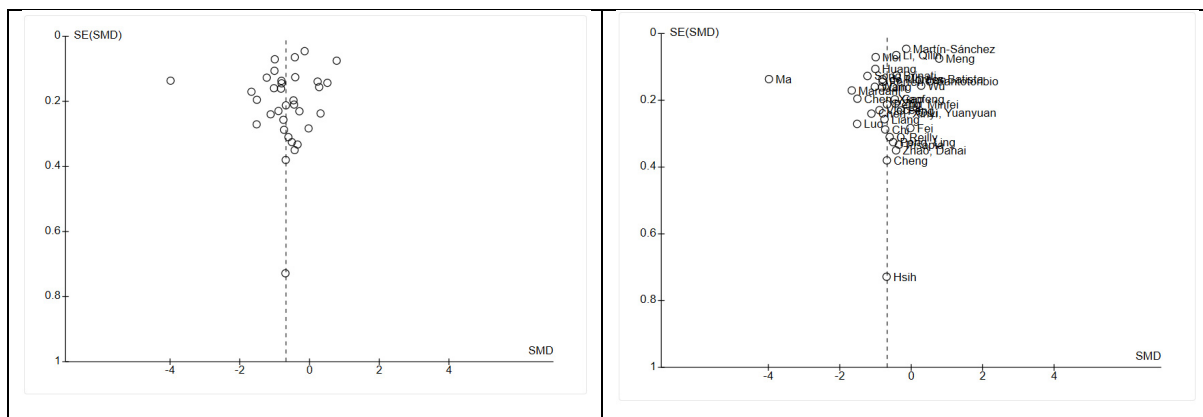

## Neutrophil count, x 109/L

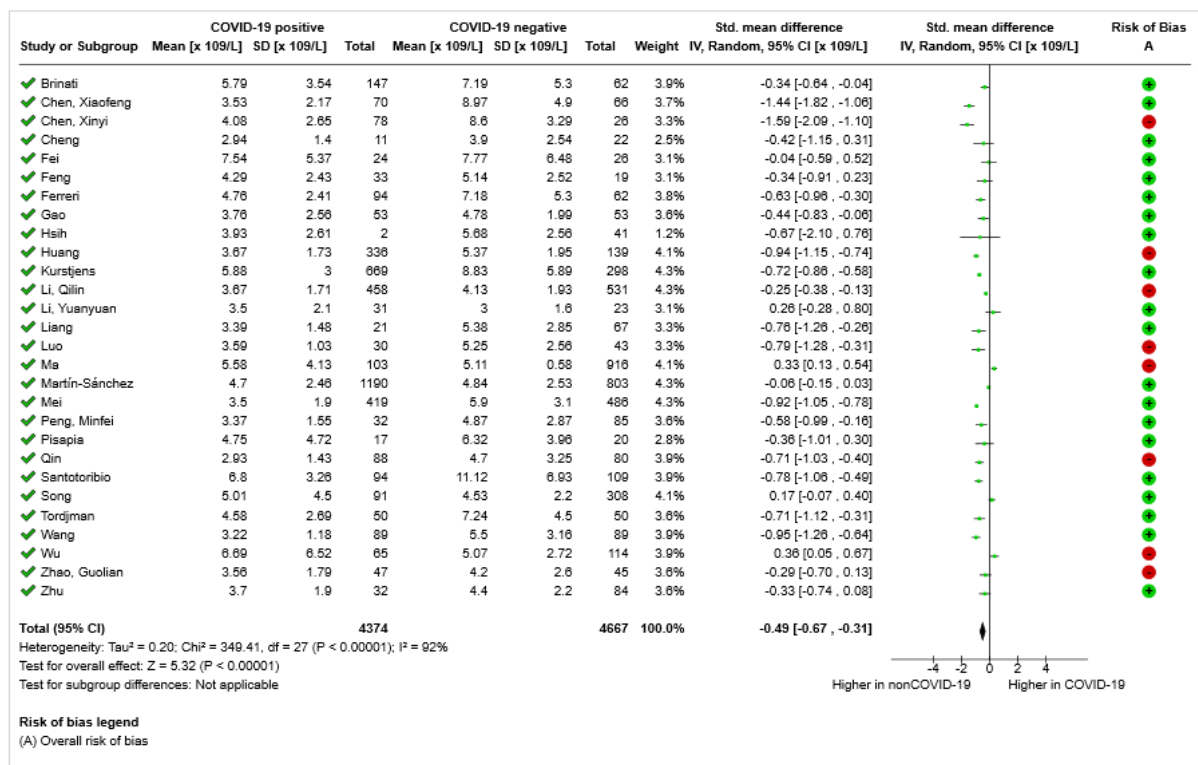

## Sensitivity analysis – low risk of bias studies

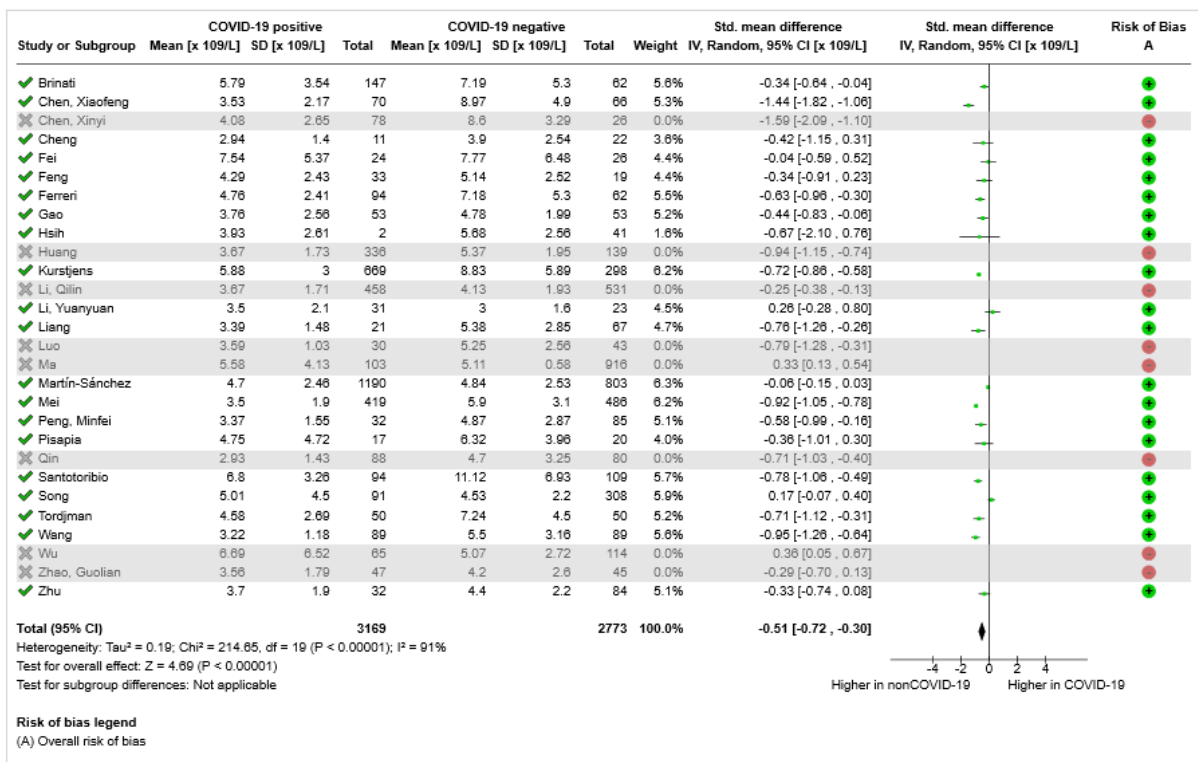

## Publication bias - funnel plot

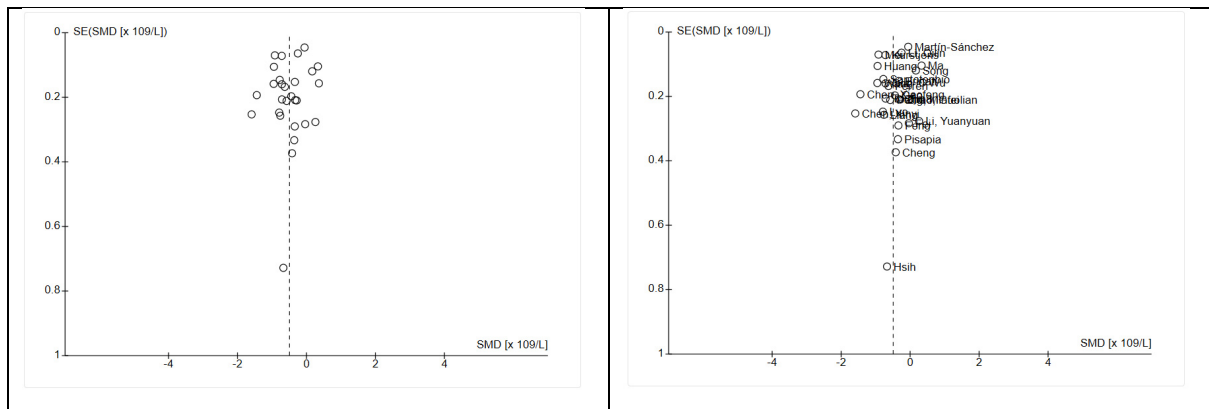

## Lymphocyte count, x 109/L

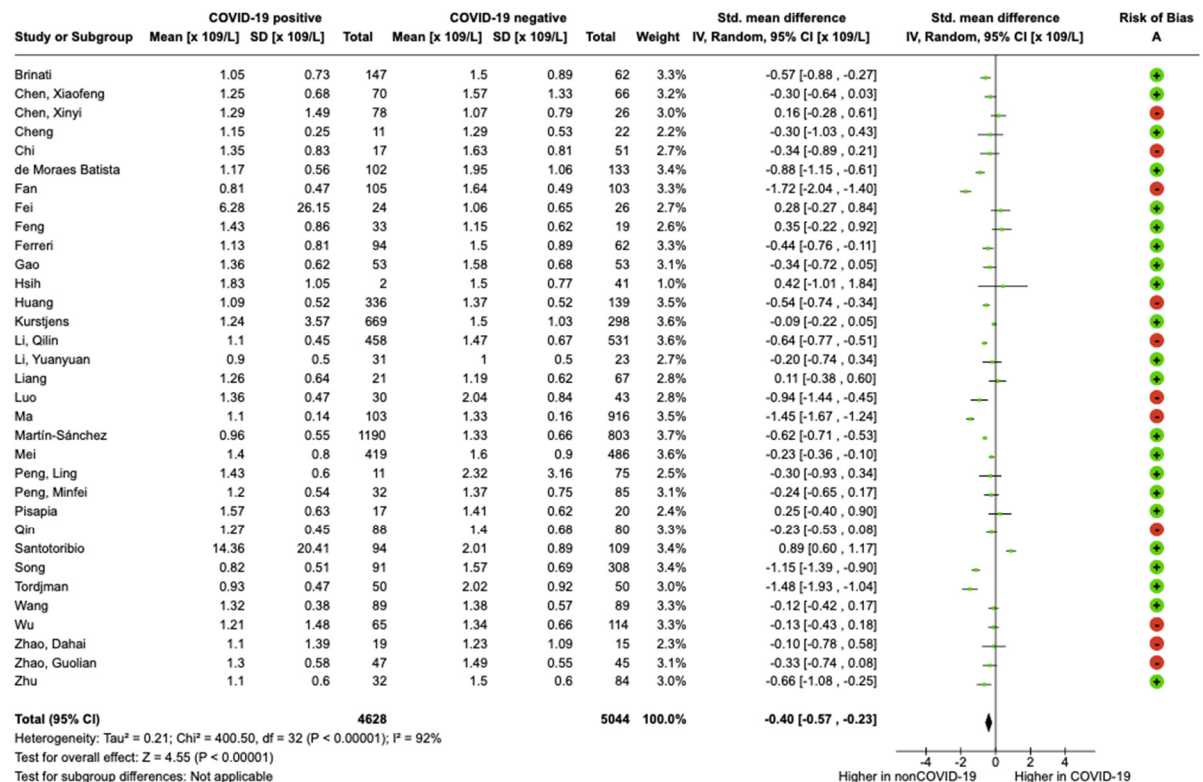

## Sensitivity analysis – low risk of bias studies

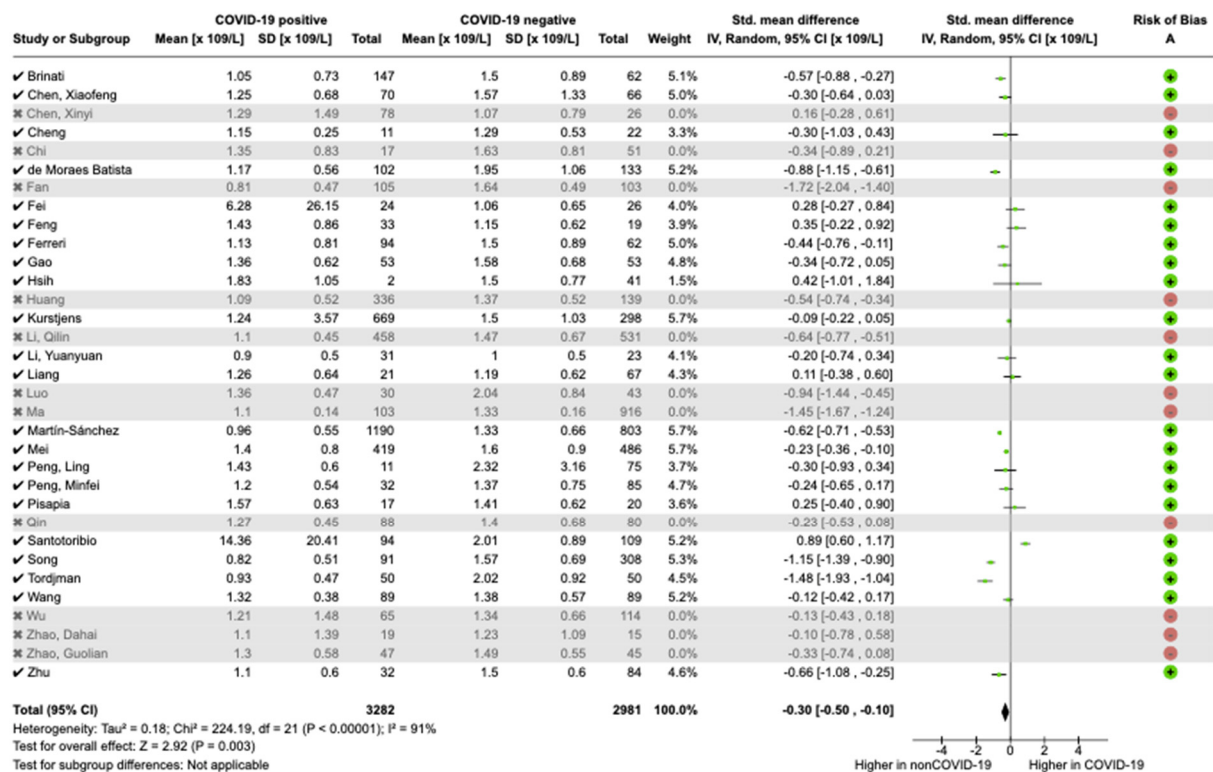

## Publication bias - funnel plot

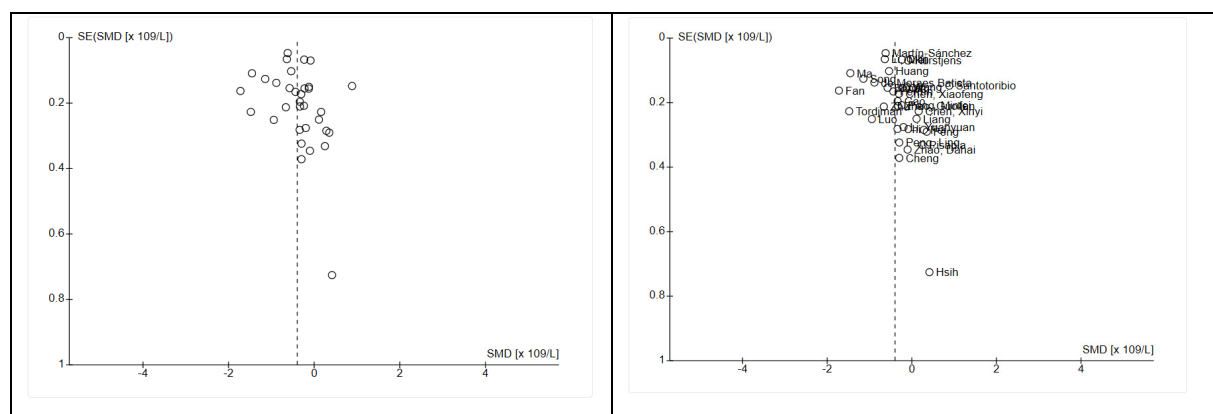

## Eosinophil count, x 109/L

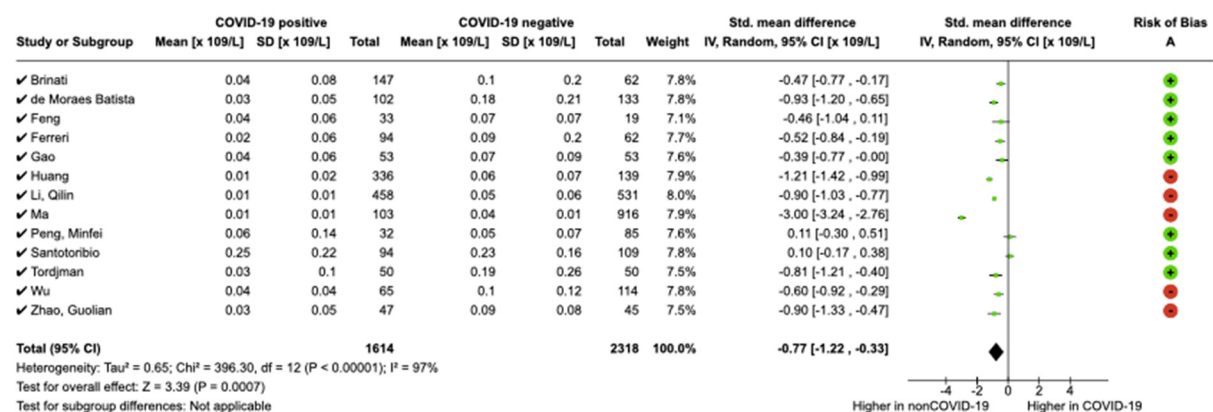

## Sensitivity analysis – low risk of bias studies

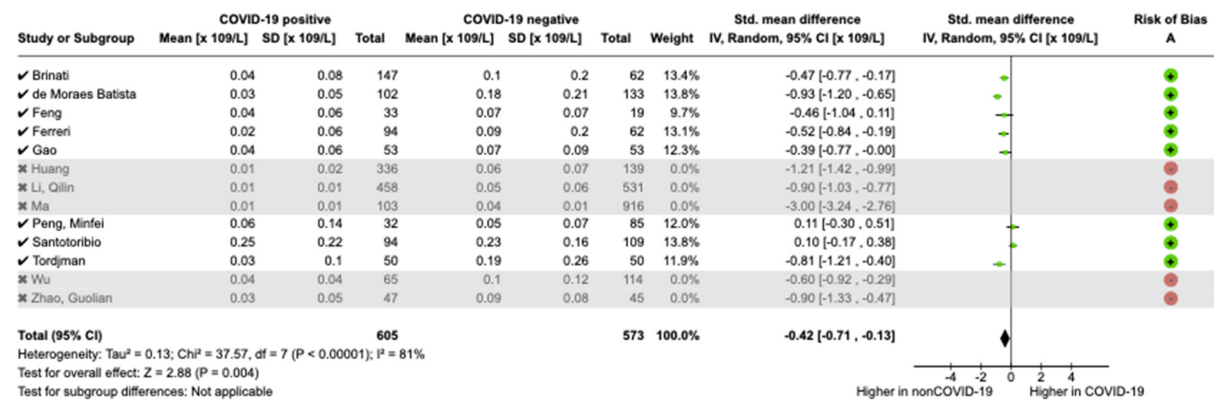

## Publication bias - funnel plot

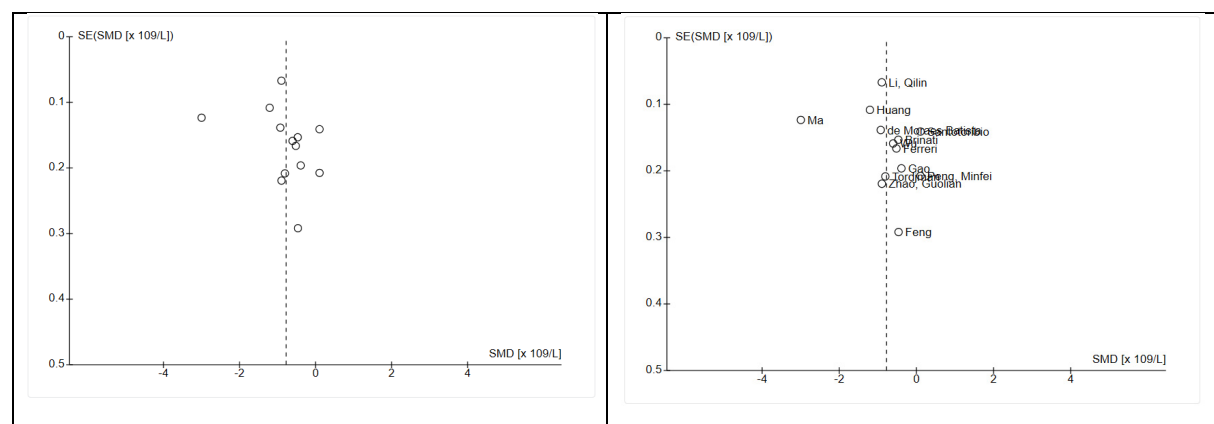

## Platelet count, x 109/L

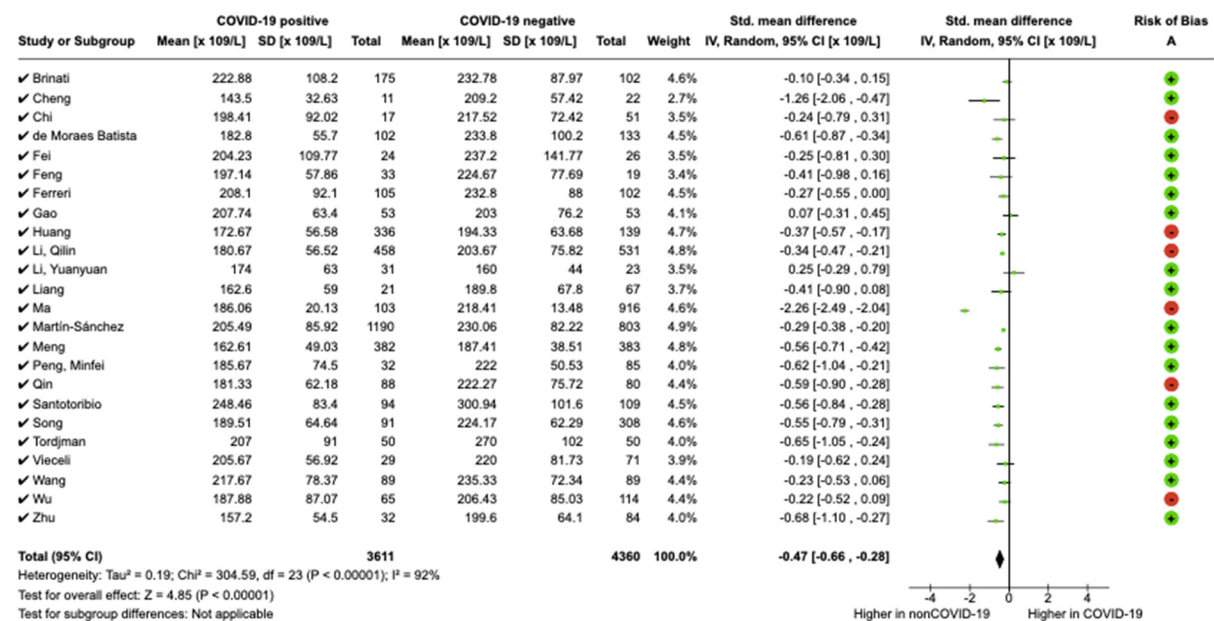



## Sensitivity analysis – low risk of bias studies

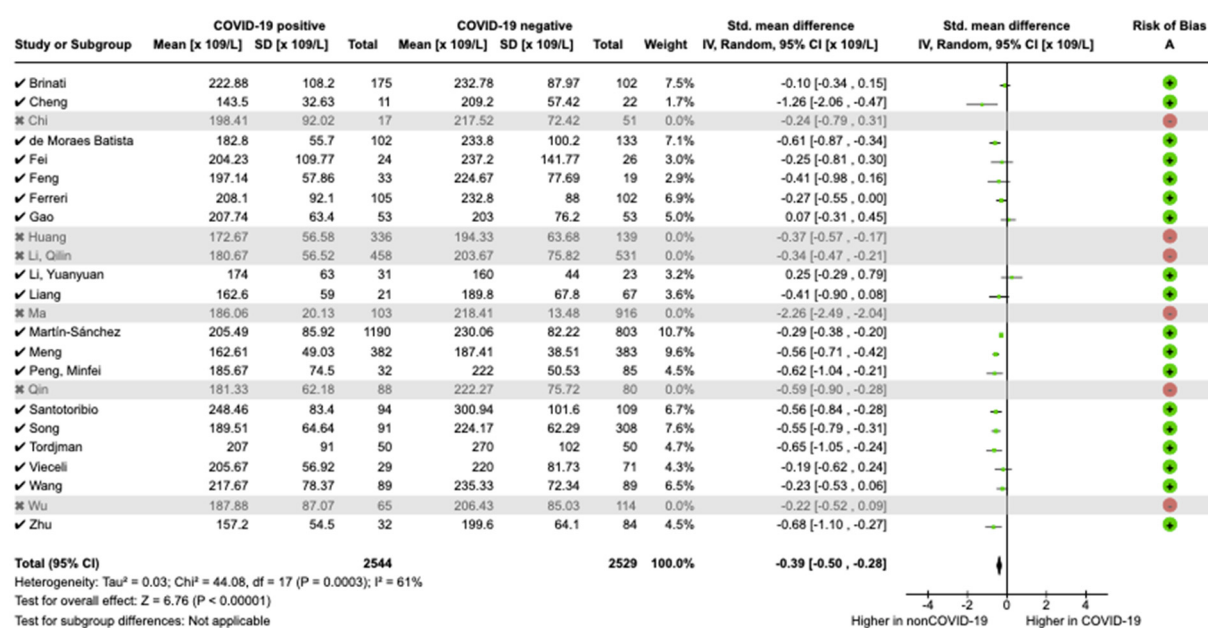

## Publication bias - funnel plot

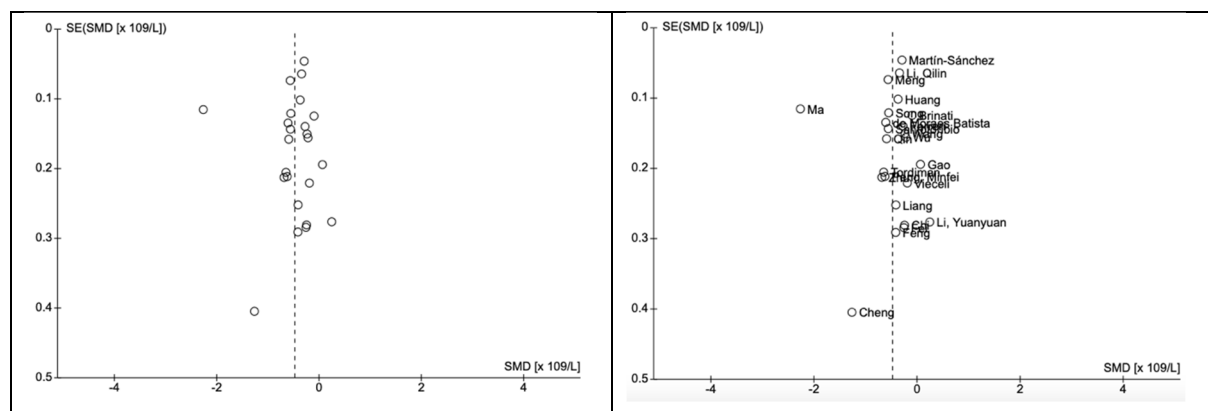

## Lactate dehydrogenase (LDH), U/L

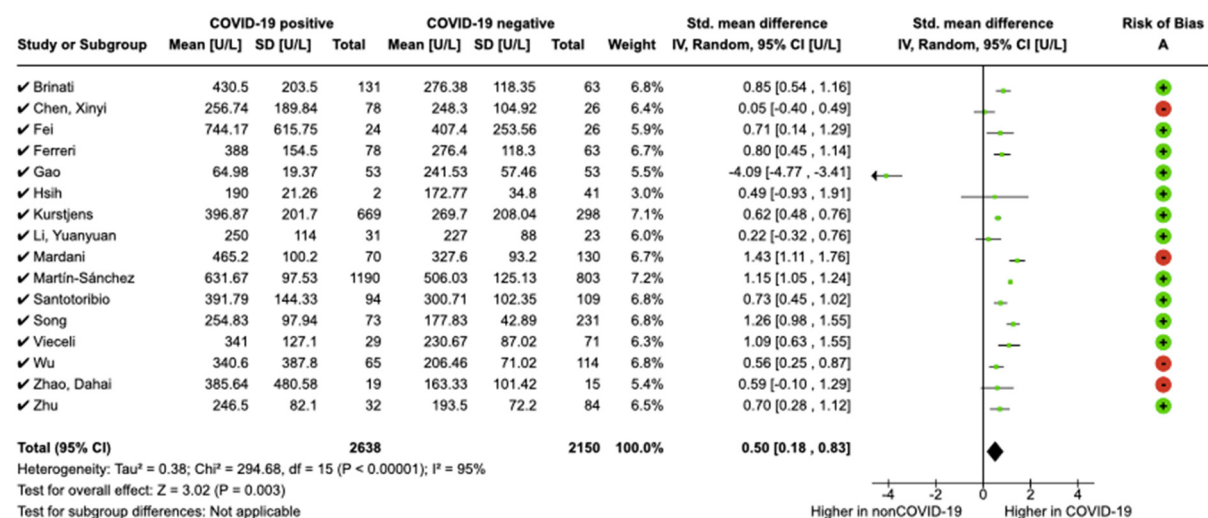

## Sensitivity analysis – low risk of bias studies

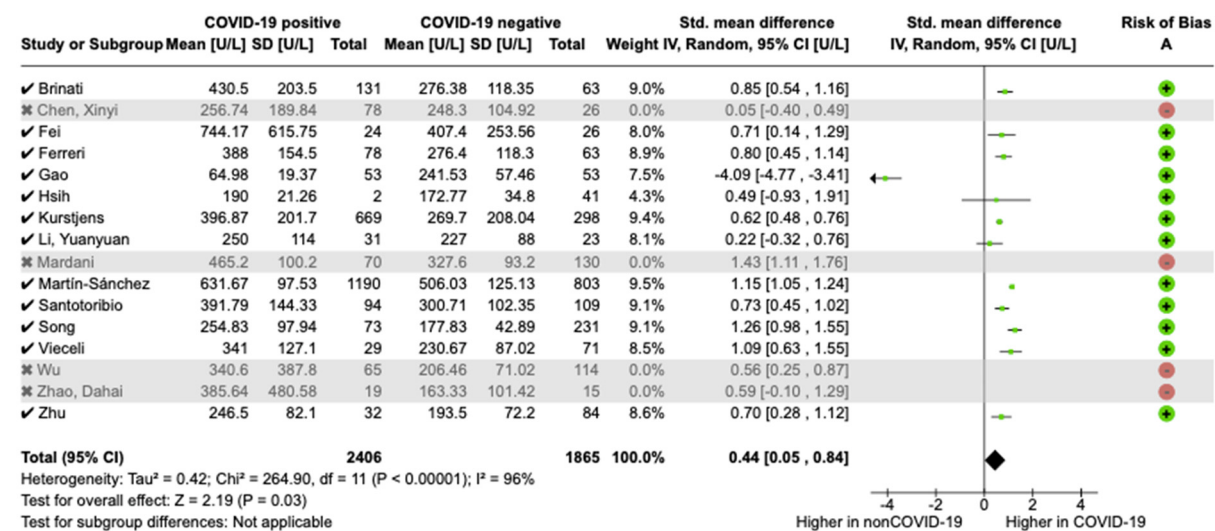

## Publication bias - funnel plot

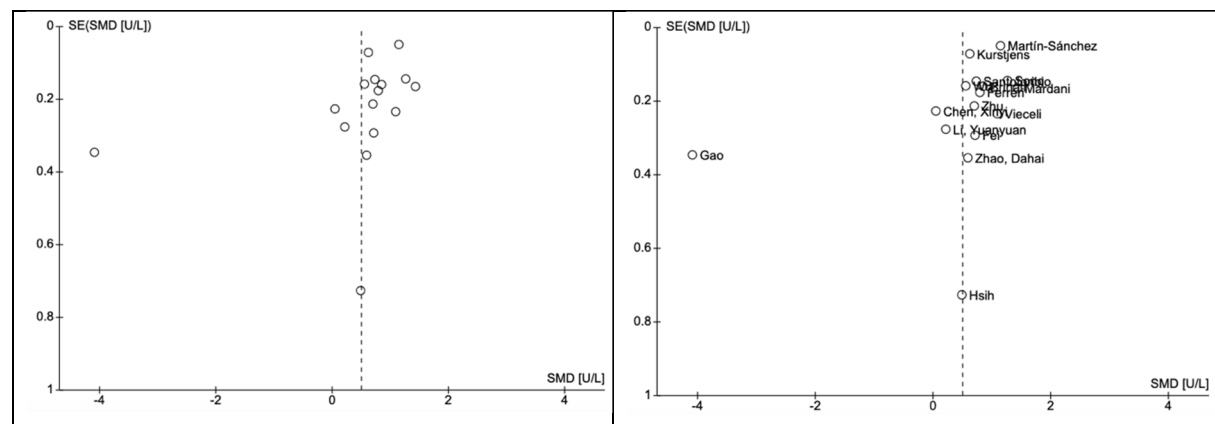

## AST - Aspartate aminotransferase, U/L

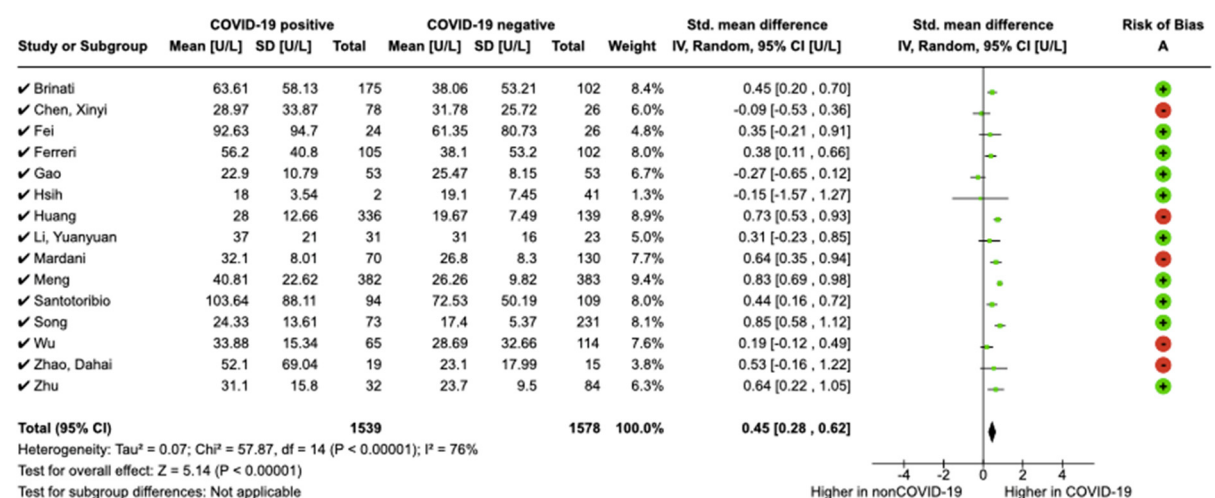



## Sensitivity analysis – low risk of bias studies

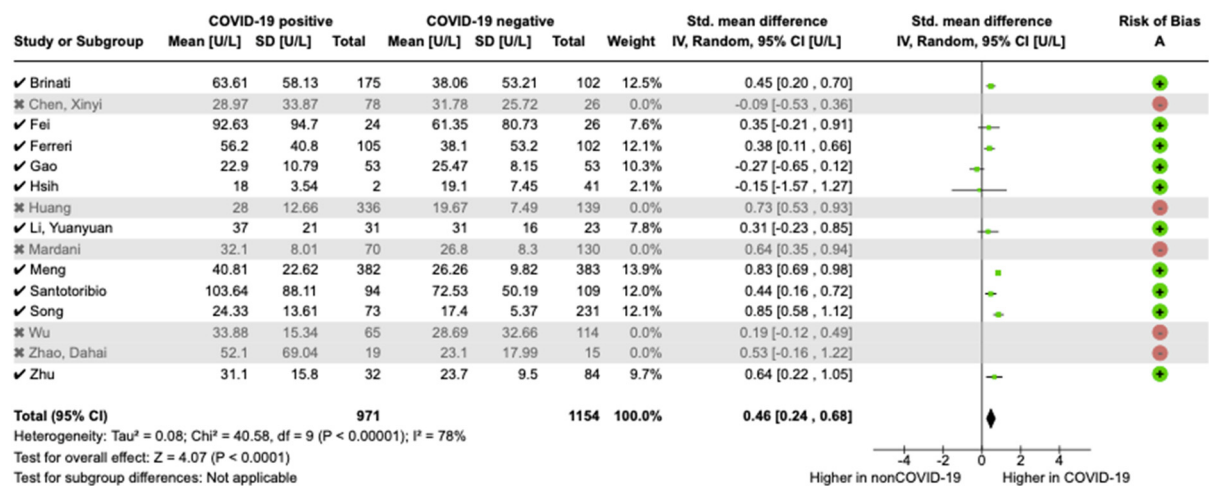

## Publication bias - funnel plot

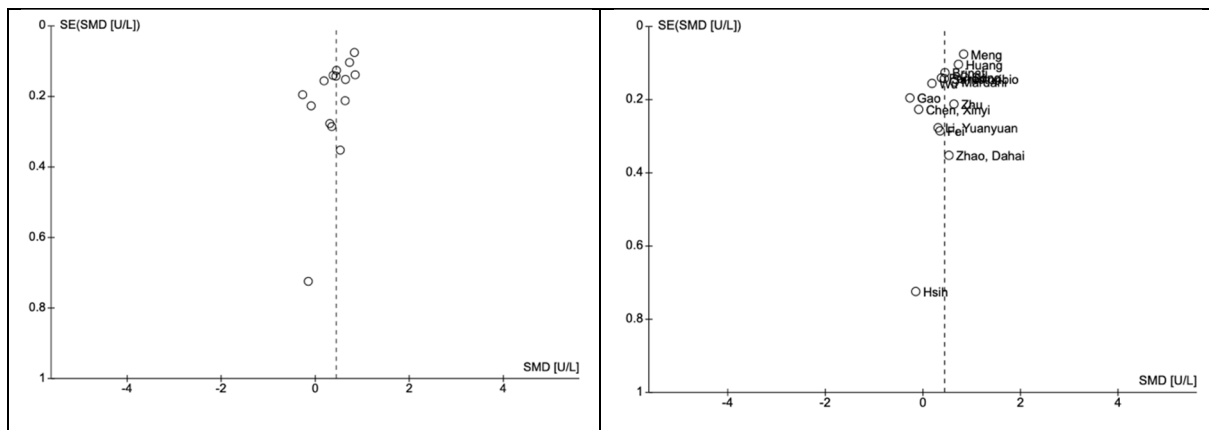

## ALT - Alanine aminotransferase, U/L

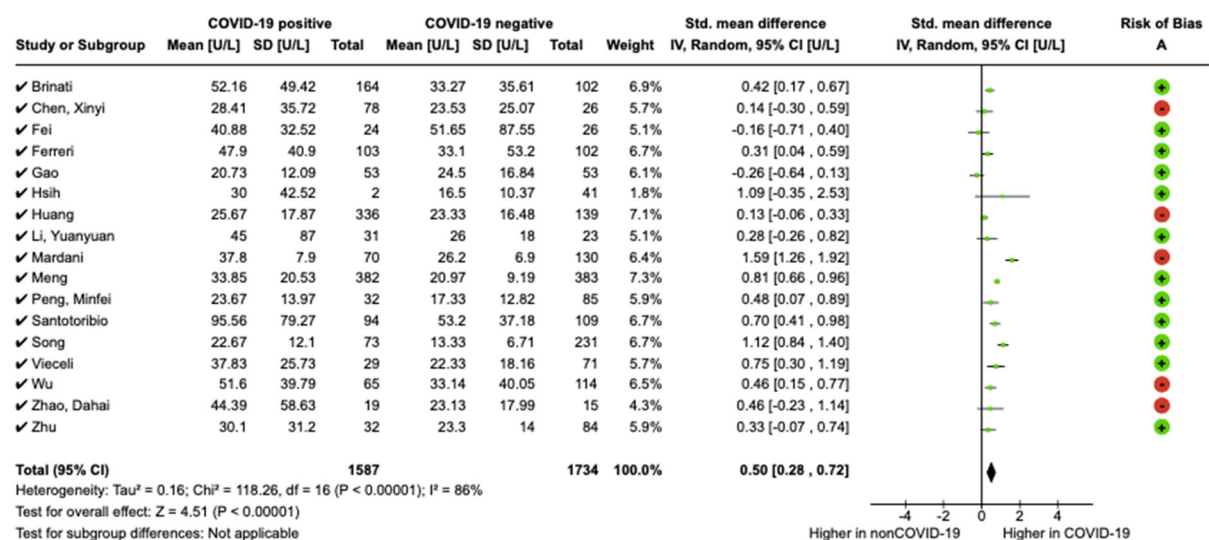

## Sensitivity analysis – low risk of bias studies

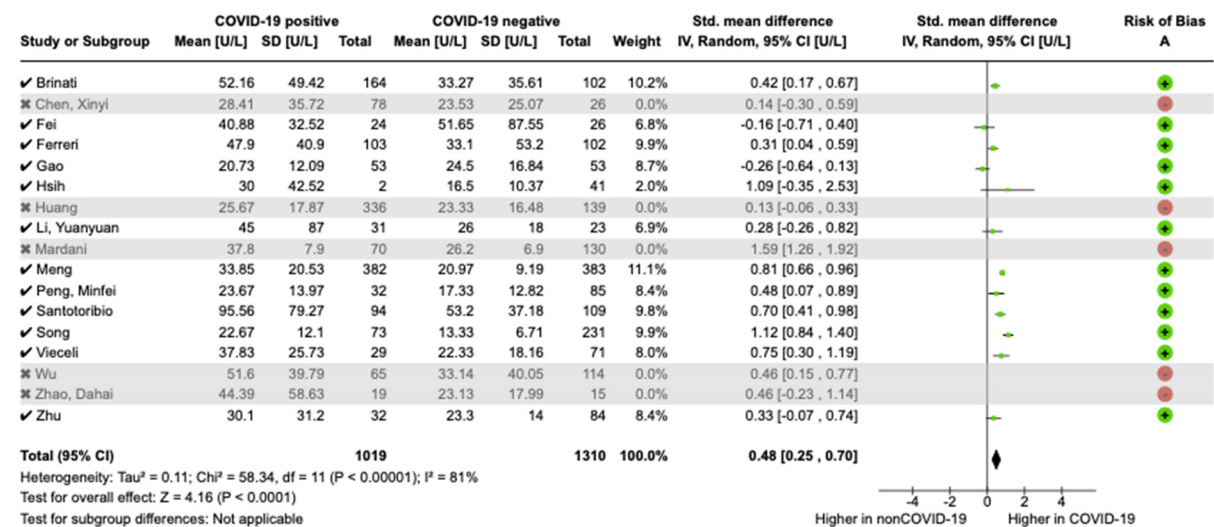

## Publication bias - funnel plot

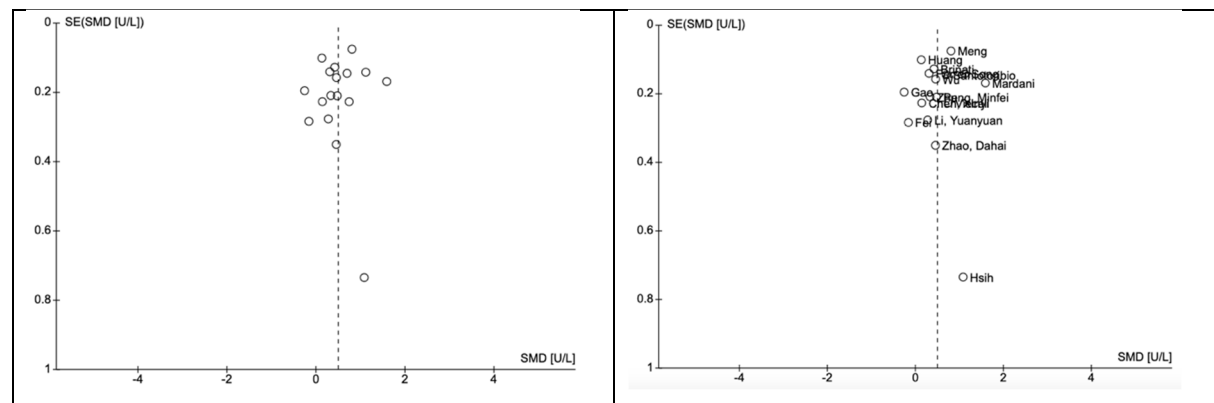

## Total bilirubin, umol/L

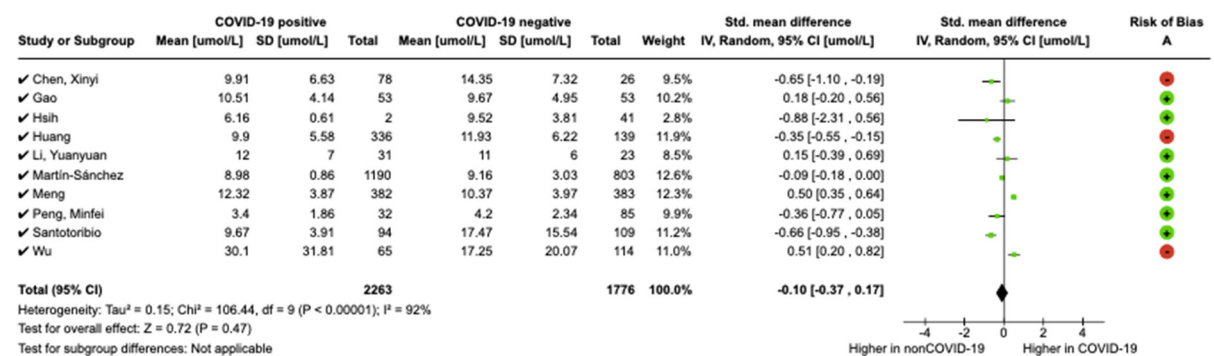

## Sensitivity analysis – low risk of bias studies

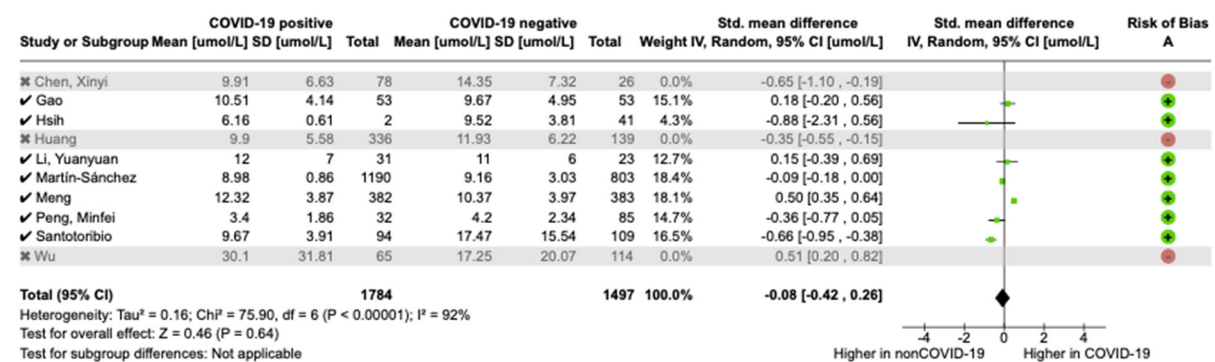

## Publication bias – funnel plot

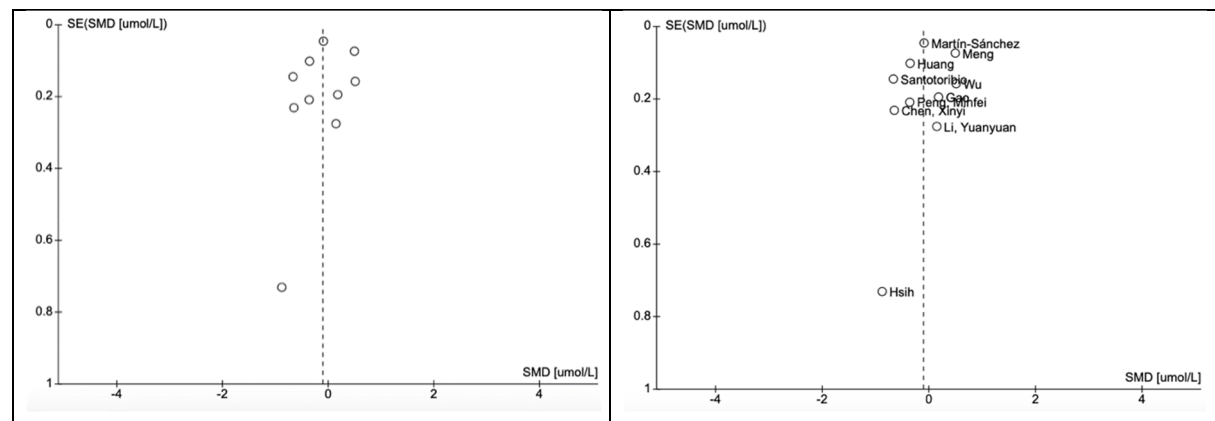

## Albumin, g/L

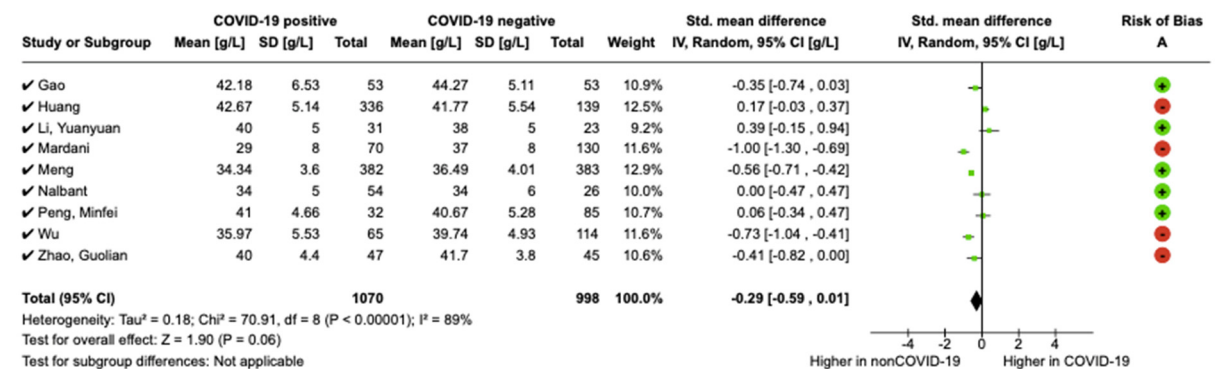

## Sensitivity analysis – low risk of bias studies

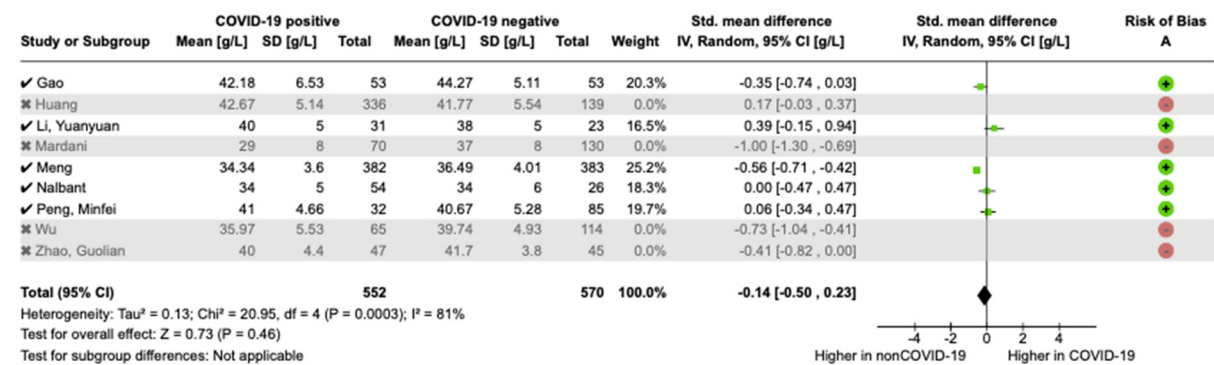

## Publication bias - funnel plot

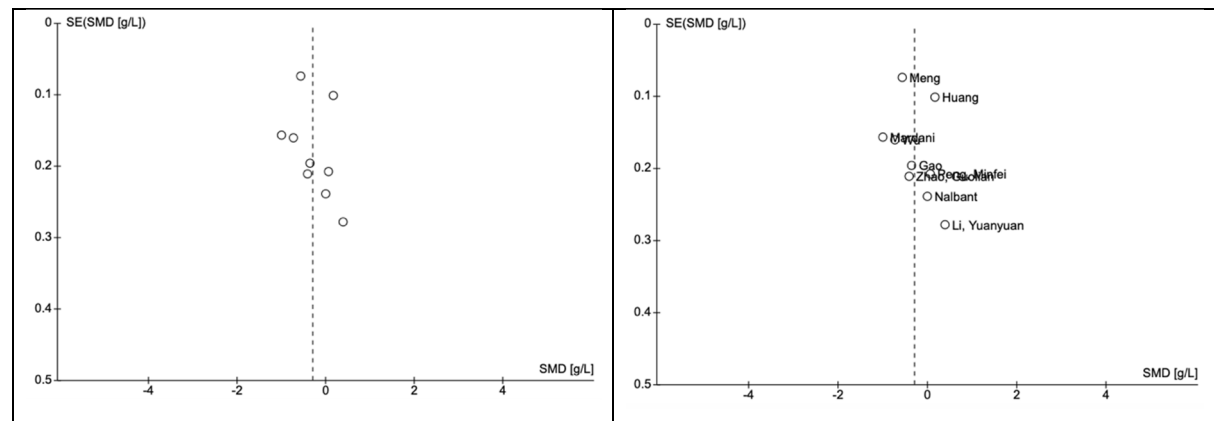

## Procalcitonin, ng/mL

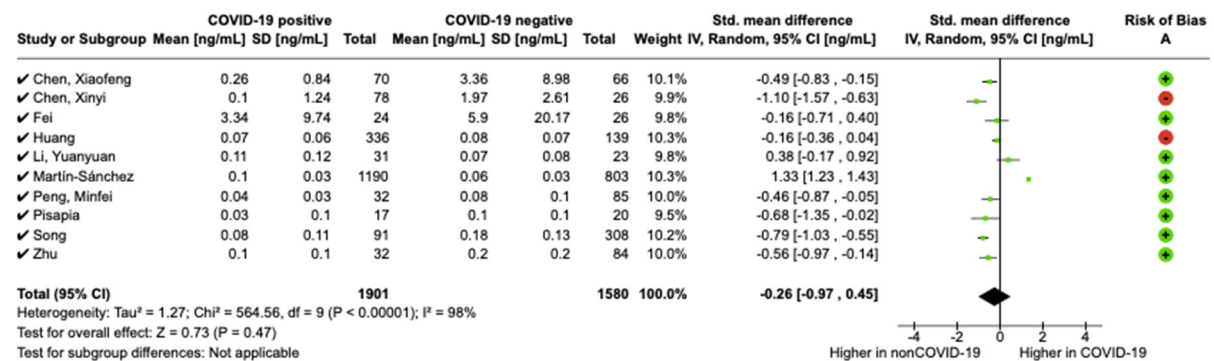

## Sensitivity analysis – low risk of bias studies

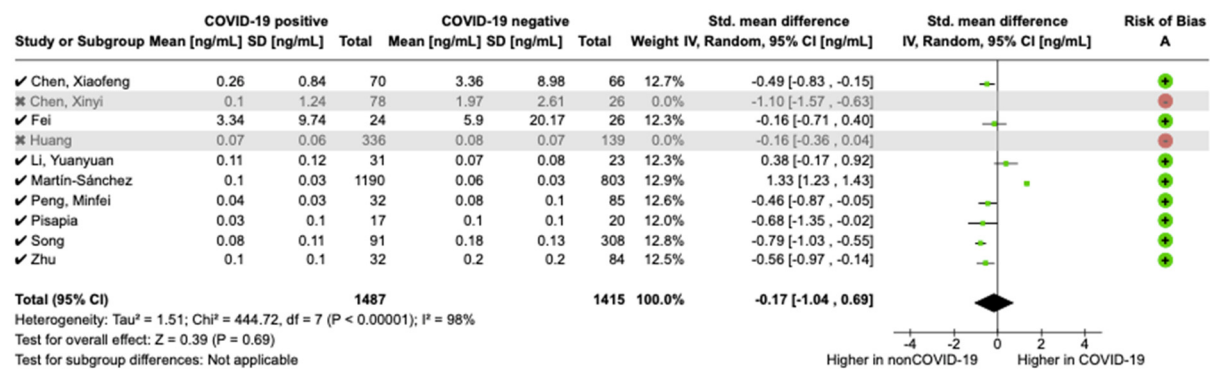

## Publication bias - funnel plot

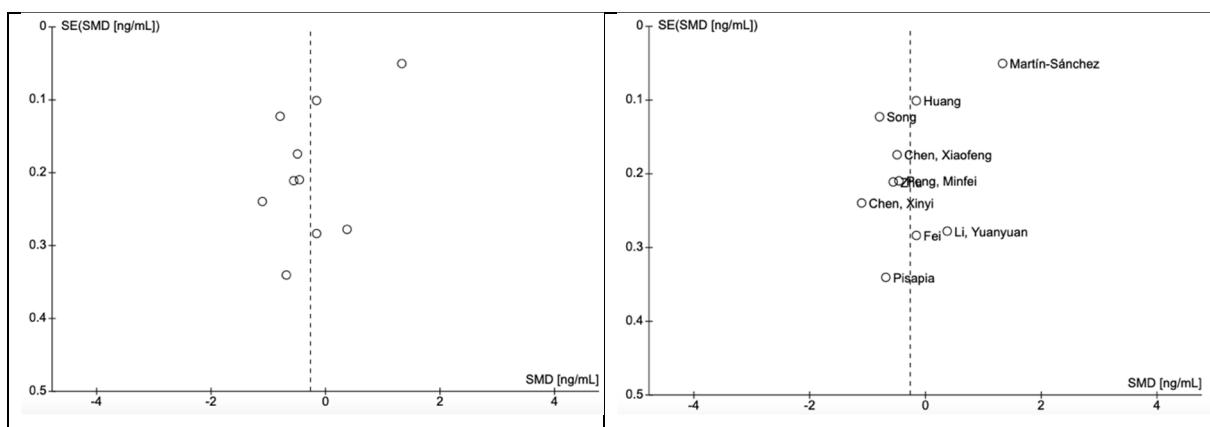

## C-Reactive Protein, mg/dL

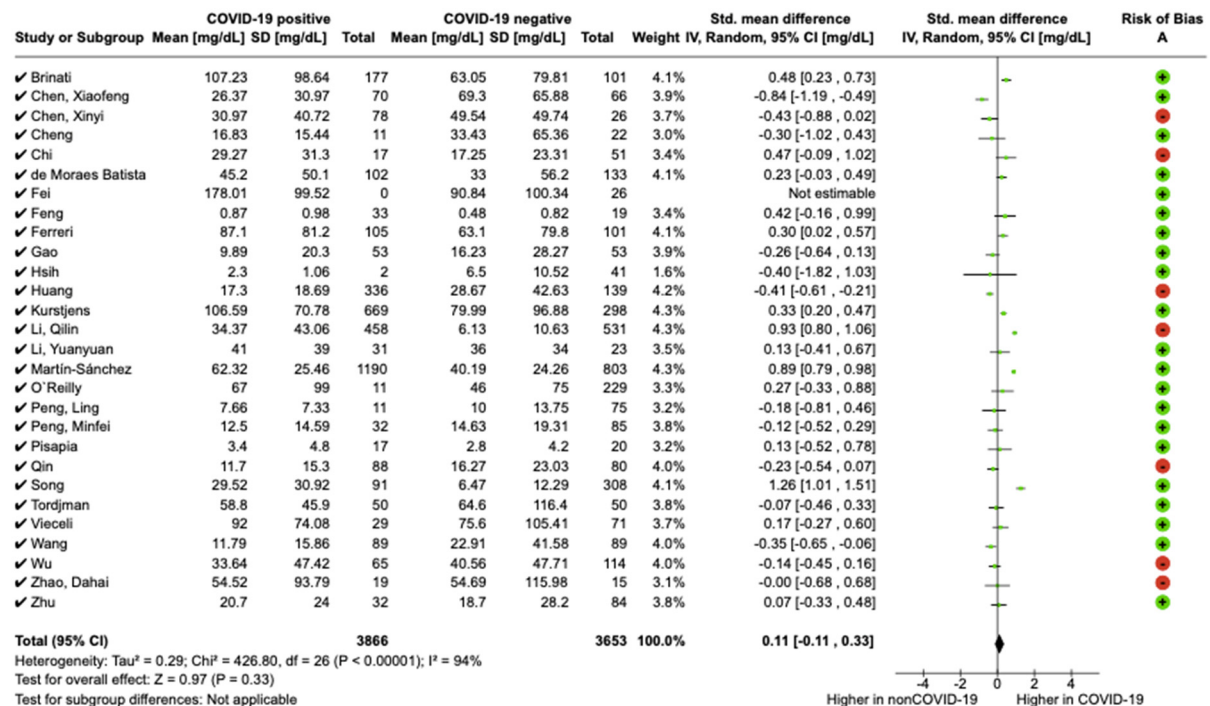



## Sensitivity analysis – low risk of bias studies

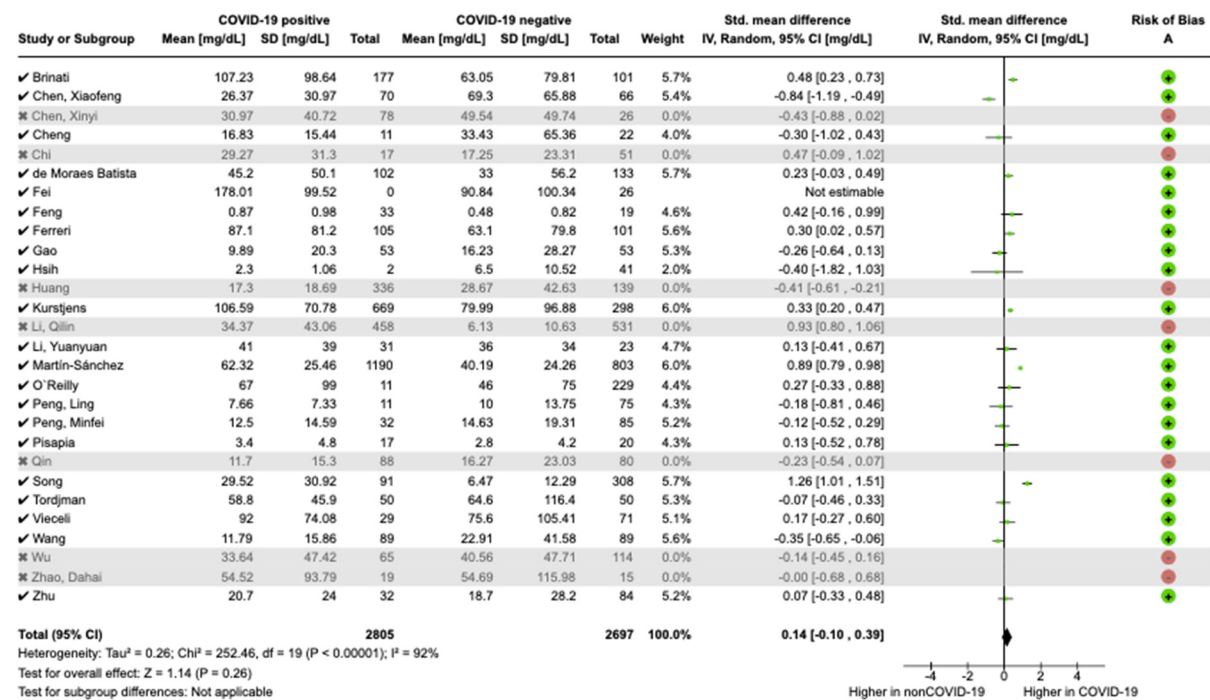

## Publication bias - funnel plot

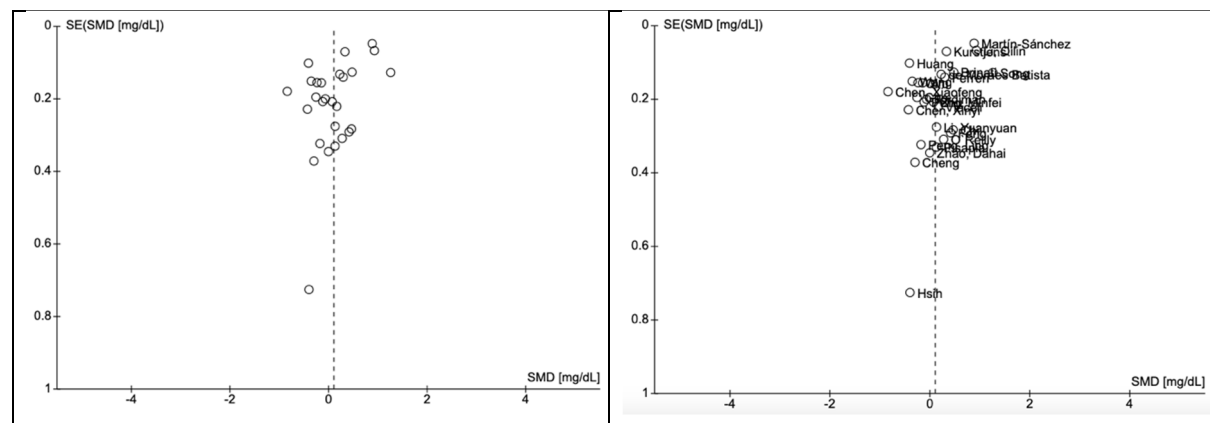

## Urea BUN, mg/dL

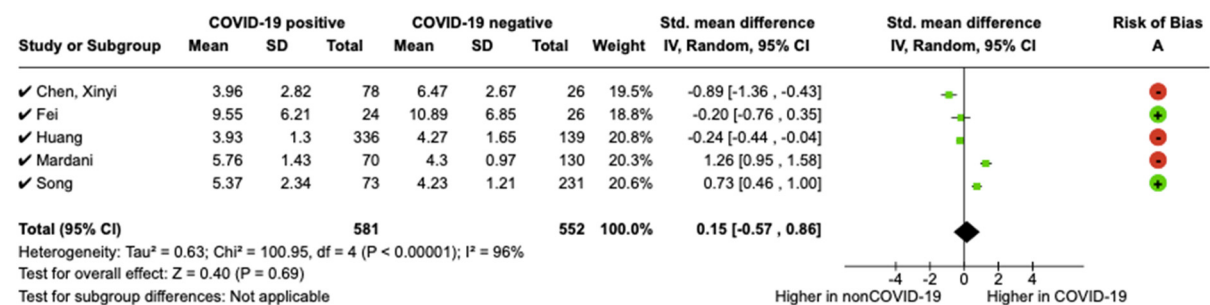

## Sensitivity analysis – low risk of bias studies

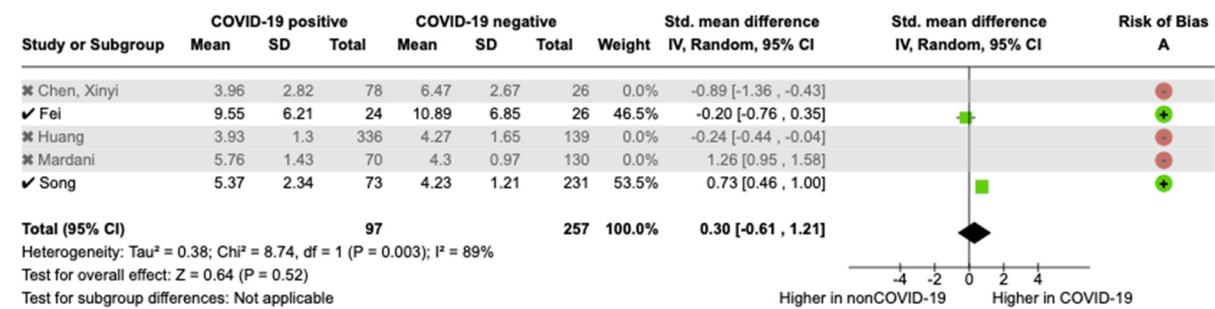

## Publication bias - funnel plot

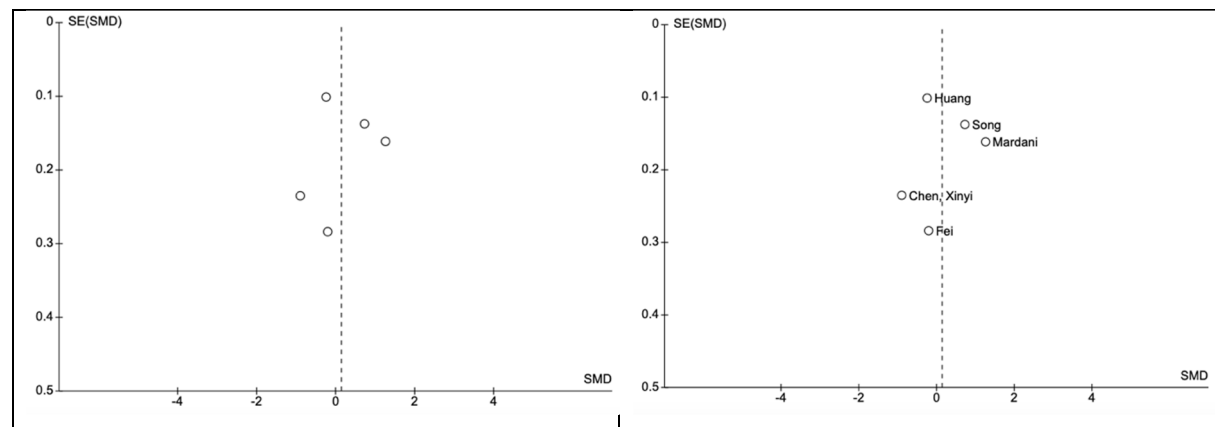

## D - dimer, mg/L

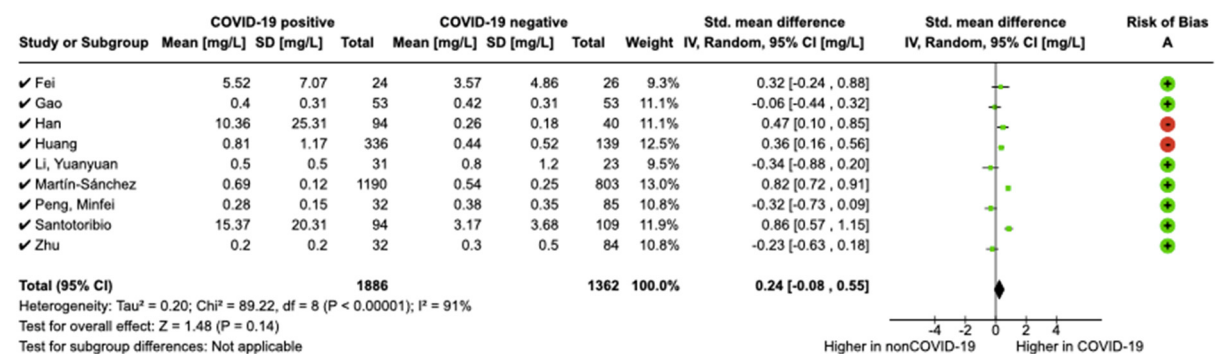

## Sensitivity analysis – low risk of bias studies

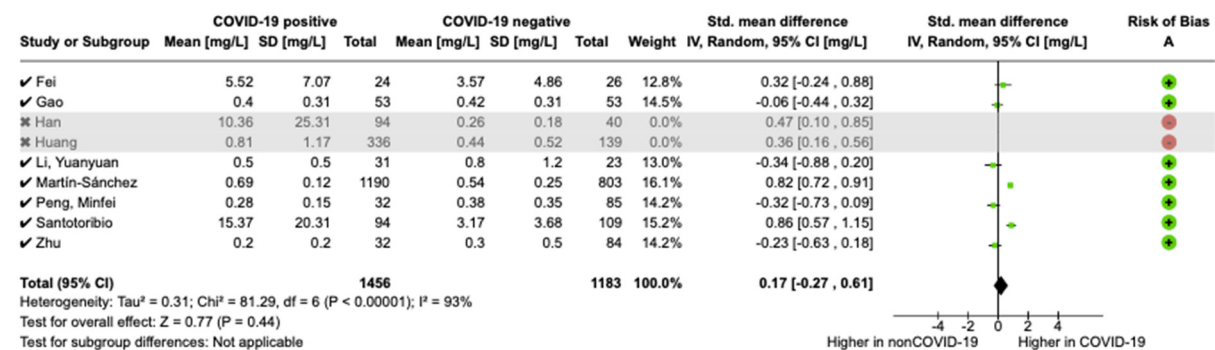

## Publication bias - funnel plot

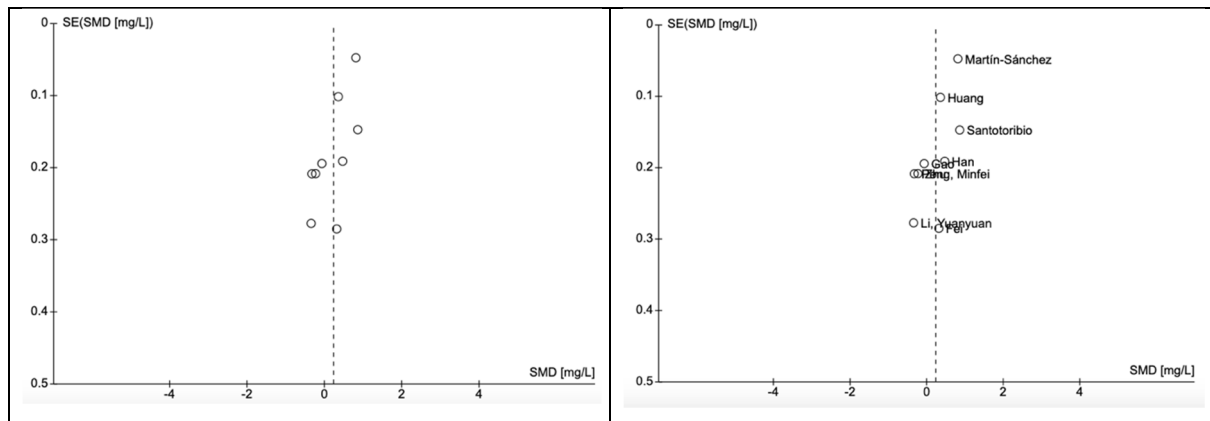

## Creatinine, umol/L

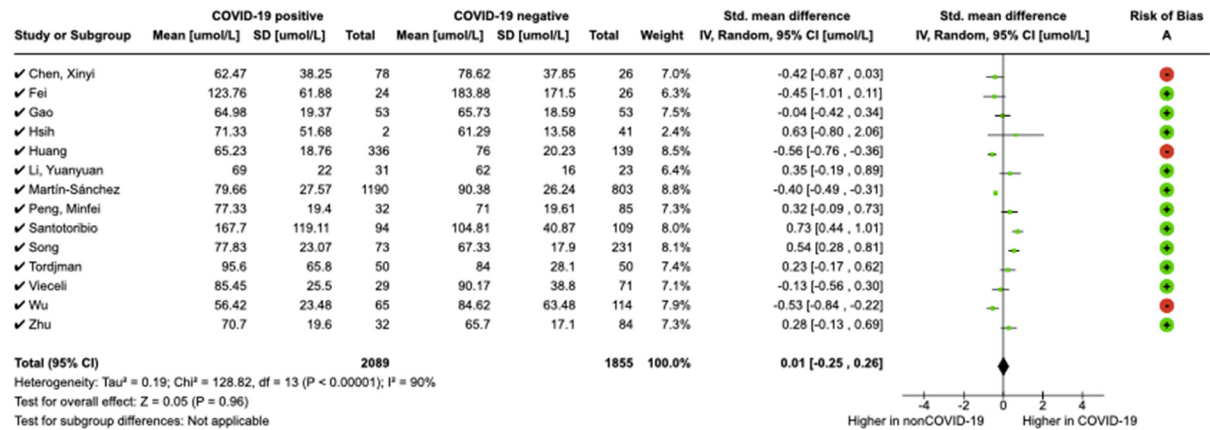

## Sensitivity analysis – low risk of bias studies

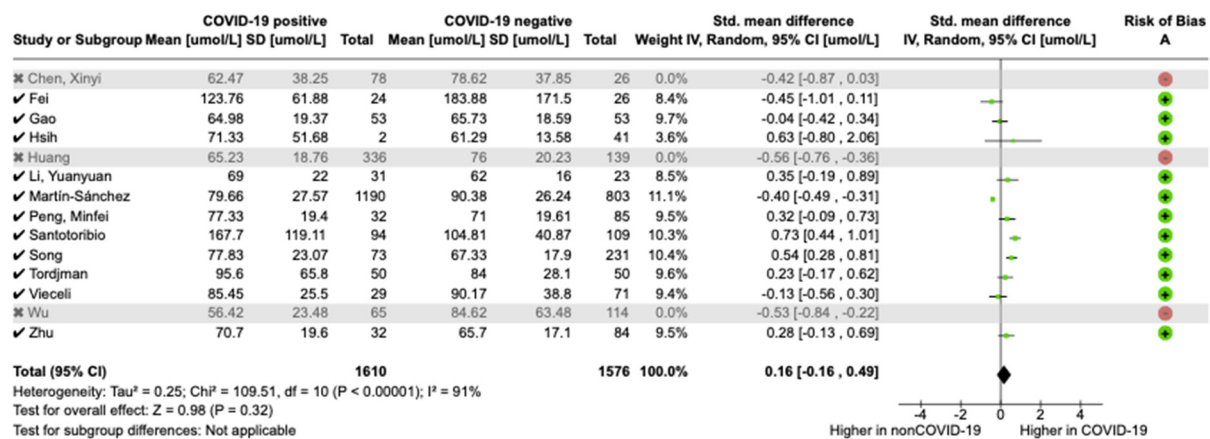

Publication bias - funnel plot

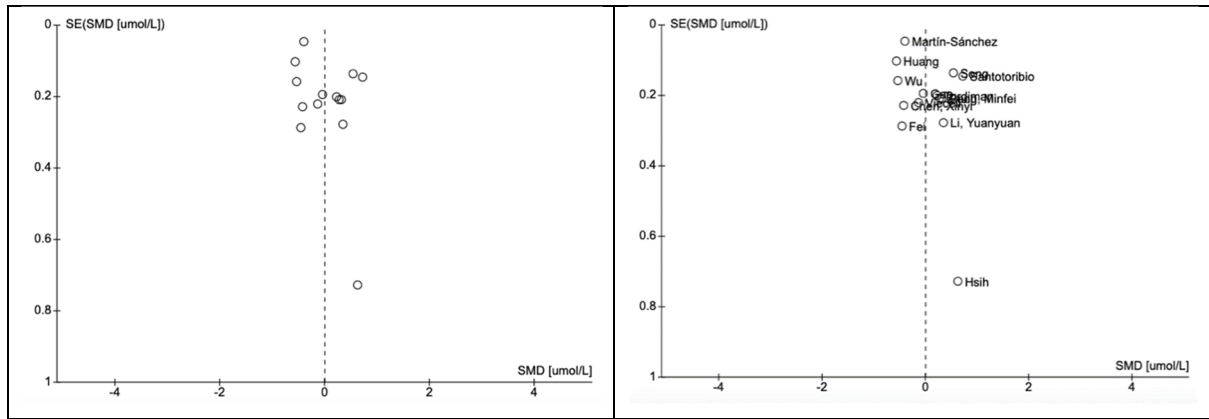

Supplement: s1 [file s1]
