# Supplementary material for: Utility of Routine Laboratory Biomarkers to Detect COVID-19: A Systematic Review and Meta-Analysis
Source: MDPI journal article supplement (doi:10.3390/v13050803), 2021-04-30
Supplement: s1 [file s1]

Table S7: Sensitivity analysis of laboratory findings between COVID-19 and Non-COVID-19 patients, high-risk of bias studies excluded, outliers excluded.

| Parameters                 | N_studies<br>[max = 26] | Normal   | Units of<br>measurement | COVID-19<br>positive | COVID-19<br>negative | Std. mean<br>difference IV<br>(random effect<br>model) [95% CI] | Effect size | Heterogeneity    |                    | Test for<br>overall<br>effect (p) |
|----------------------------|-------------------------|----------|-------------------------|----------------------|----------------------|-----------------------------------------------------------------|-------------|------------------|--------------------|-----------------------------------|
|                            |                         | Ranges   |                         | Total                | Total                |                                                                 |             | Tau <sup>2</sup> | I <sup>2</sup> (%) |                                   |
| White cell count           | 22                      | 4.0-11.0 | 10 <sup>9</sup> /L      | 2930                 | 3287                 | -0.5 [-0.78, -0.23]                                             | Medium      | 0.37             | 95%                | < 0.001                           |
| Neutrophil count           | 20                      | 2.0-7.0  | 10 <sup>9</sup> /L      | 3169                 | 2773                 | -0.51 [-0.72, -0.3]                                             | Large       | 0.19             | 91%                | < 0.001                           |
| Lymphocyte count           | 20                      | 1.5-4.0  | 10 <sup>9</sup> /L      | 3164                 | 2846                 | -0.4 [-0.57, -0.23]                                             | Medium      | 0.11             | 86%                | < 0.001                           |
| Eosinophil count           | 8                       | 0.04-0.4 | 10 <sup>9</sup> /L      | 605                  | 573                  | -0.42 [-0.71, -0.13]                                            | Medium      | 0.13             | 81%                | 0.004                             |
| Platelet count             | 18                      | 150-450  | 10 <sup>9</sup> /L      | 2544                 | 2529                 | -0.39 [-0.5, -0.28]                                             | Medium      | 0.03             | 61%                | < 0.001                           |
| Lactate dehydrogenase      | 12                      | 135-225  | U/L                     | 2406                 | 1865                 | 0.44 [0.05, 0.84]                                               | Medium      | 0.42             | 96%                | 0.03                              |
| Aspartate aminotransferase | 10                      | 0-40     | U/L                     | 971                  | 1154                 | 0.64 [0.22, 0.68]                                               | Large       | 0.08             | 78%                | < 0.001                           |
| Alanine aminotransferase   | 12                      | 0-40     | U/L                     | 1019                 | 1310                 | 0.48 [0.25, 0.7]                                                | Medium      | 0.11             | 81%                | < 0.001                           |
| Total bilirubin            | 7                       | <21      | umol/L                  | 1784                 | 1497                 | -0.08 [-0.42, 0.26]                                             | Small       | 0.16             | 92%                | 0.64                              |
| Albumin                    | 5                       | 35-50    | g/L                     | 552                  | 570                  | -0.14 [-0.5, 0.23]                                              | Small       | 0.13             | 81%                | 0.46                              |
| C-Reactive Protein         | 21                      | <5       | mg/L                    | 2824                 | 2697                 | 0.17 [-0.07, 0.41]                                              | Small       | 0.25             | 92%                | 0.26                              |
| Procalcitonin              | 7                       | <0.05    | ng/mL                   | 1463                 | 1389                 | -0.18 [-1.12, 0.77]                                             | Small       | 1.58             | 99%                | 0.71                              |
| Creatinine                 | 9                       | 45-104   | umol/L                  | 1492                 | 1441                 | 0.15 [-0.18, 0.48]                                              | Small       | 0.2              | 89%                | 0.36                              |
| Blood urea nitrogen        | 2                       | 2.5-7.8  | mmol/L                  | 97                   | 257                  | 0.30 [-0.61, 1.21]                                              | Medium      | 0.38             | 89%                | 0.52                              |

|                    |   |      |      |      |      |                    |       |      |     |      |
|--------------------|---|------|------|------|------|--------------------|-------|------|-----|------|
| <b>D-Dimer FEU</b> | 7 | <0.1 | mg/L | 1456 | 1183 | 0.17 [-0.27, 0.61] | Small | 0.31 | 93% | 0.44 |
|--------------------|---|------|------|------|------|--------------------|-------|------|-----|------|

U/L = units per litre, CI = confidence interval, IV = weighted mean difference.
