# Supplementary material for: Utility of Routine Laboratory Biomarkers to Detect COVID-19: A Systematic Review and Meta-Analysis
Source: MDPI journal article supplement (doi:10.3390/v13050803), 2021-04-30
Supplement: s1 [file s1]

Table S6: Meta-analysis of laboratory findings between COVID-19 and Non-COVID-19 patients, outliers not included.

| Parameters                 | N_studies  | Normal   | Units of    | COVID-   | COVID-   | N_patients | %_positive | Std. mean            | Effect | Heterogeneit |        | Test for | % low   |
|----------------------------|------------|----------|-------------|----------|----------|------------|------------|----------------------|--------|--------------|--------|----------|---------|
|                            | [max = 38] |          | measurement | 19       | 19       |            |            | difference IV        | size   |              | y      | overall  | risk of |
|                            |            |          |             | positive | negative |            |            | (random effect       |        |              |        | effect   | bias    |
|                            |            | Ranges   |             | Total    | Total    |            |            | model) [95% CI]      |        | Tau²         | I² (%) | (p)      |         |
| White cell count           | 33         | 4.0-11.0 | 10^9/L      | 4299     | 5483     | 9782       | 43.90%     | -0.68 [-0.98, -0.38] | Large  | 0.72         | 97.00% | < 0.001  | 66.70%  |
| Neutrophil count           | 28         | 2.0-7.0  | 10^9/L      | 4374     | 4667     | 9041       | 48.40%     | -0.49 [-0.67, -0.31] | Medium | 0.2          | 92.00% | < 0.001  | 71.40%  |
| Lymphocyte count           | 31         | 1.5-4.0  | 10^9/L      | 4510     | 4909     | 9419       | 47.90%     | -0.47 [-0.63, -0.31] | Medium | 0.16         | 90.00% | < 0.001  | 64.50%  |
| Eosinophil count           | 12         | 0.04-0.4 | 10^9/L      | 1520     | 2209     | 3729       | 40.80%     | -0.85 [-1.3, -0.4]   | Large  | 0.6          | 97.00% | < 0.001  | 58.30%  |
| Platelet count             | 24         | 150-450  | 10^9/L      | 3611     | 4360     | 7971       | 45.30%     | -0.47 [-0.66, -0.28] | Medium | 0.19         | 92.00% | < 0.001  | 75.00%  |
| Lactate dehydrogenase      | 14         | 135-225  | U/L         | 1424     | 1321     | 2745       | 51.90%     | 0.42 [0.02, 0.83]    | Medium | 0.53         | 95.00% | 0.04     | 71.40%  |
| Aspartate aminotransferase | 13         | 0-40     | U/L         | 1421     | 1443     | 2864       | 49.60%     | 0.45 [0.26, 0.64]    | Medium | 0.09         | 79.00% | < 0.001  | 61.50%  |
| Alanine aminotransferase   | 16         | 0-40     | U/L         | 1493     | 1625     | 3118       | 47.90%     | 0.49 [0.25, 0.72]    | Medium | 0.18         | 87.00% | < 0.001  | 68.80%  |
| Total bilirubin            | 9          | <21      | umol/L      | 2198     | 1662     | 3860       | 56.90%     | -0.18 [-0.46, 0.11]  | Small  | 0.15         | 92.00% | 0.23     | 66.70%  |
| Albumin                    | 9          | 35-50    | g/L         | 1070     | 998      | 2068       | 51.70%     | -0.29 [-0.59, 0.01]  | Medium | 0.18         | 89.00% | 0.06     | 55.60%  |
| C-Reactive Protein         | 27         | <5       | mg/L        | 3866     | 3627     | 7493       | 51.50%     | 0.11 [-0.11, 0.33]   | Small  | 0.29         | 94.00% | 0.33     | 74.00%  |
| Procalcitonin              | 9          | <0.05    | ng/mL       | 1877     | 1554     | 3431       | 54.70%     | -0.28 [-1.03, 0.48]  | Medium | 1.3          | 99.00% | 0.48     | 75.00%  |
| Creatinine                 | 12         | 45-104   | umol/L      | 1971     | 1720     | 3691       | 53.40%     | -0.04 [-0.28, 0.21]  | Small  | 0.14         | 87.00% | 0.77     | 57.10%  |
| Blood urea nitrogen        | 5          | 2.5-7.8  | mmol/L      | 581      | 552      | 1133       | 51.30%     | 0.15 [-0.57, 0.86]   | Small  | 0.63         | 96.00% | 0.69     | 40.00%  |

|                    |   |      |      |      |      |      |        |                    |       |      |        |      |        |
|--------------------|---|------|------|------|------|------|--------|--------------------|-------|------|--------|------|--------|
| <b>D-Dimer FEU</b> | 6 | <0.1 | mg/L | 1674 | 1187 | 2861 | 58.50% | 0.07 [-0.37, 0.51] | Small | 0.27 | 94.00% | 0.76 | 66.70% |
|--------------------|---|------|------|------|------|------|--------|--------------------|-------|------|--------|------|--------|

U/L = units per litre, CI = confidence interval, IV = weighted mean difference. *Normal ranges from Newcastle Laboratories.*
