# Supplementary material for: Utility of Routine Laboratory Biomarkers to Detect COVID-19: A Systematic Review and Meta-Analysis
Source: MDPI journal article supplement (doi:10.3390/v13050803), 2021-04-30
Supplement: s1 [file s1]

Table S8: Sensitivity analysis of laboratory findings between COVID-19 and Non-COVID-19 patients, pre-prints excluded, outliers excluded.

| Parameters                 | N_studies<br>[max = 30] | Normal   | Units of<br>measurement | COVID-19<br>positive | COVID-19<br>negative | Std. mean<br>difference IV<br>(random effect<br>model) [95% CI] | Effect size | Heterogeneity    |                    | Test for<br>overall<br>effect (p) |
|----------------------------|-------------------------|----------|-------------------------|----------------------|----------------------|-----------------------------------------------------------------|-------------|------------------|--------------------|-----------------------------------|
|                            |                         | Ranges   |                         | Total                | Total                |                                                                 |             | Tau <sup>2</sup> | I <sup>2</sup> (%) |                                   |
| White cell count           | 25                      | 4.0-11.0 | 10 <sup>9</sup> /L      | 3484                 | 4259                 | -0.80 [-1.14, -0.45]                                            | Large       | 0.69             | 97%                | < 0.001                           |
| Neutrophil count           | 20                      | 2.0-7.0  | 10 <sup>9</sup> /L      | 3925                 | 3850                 | -0.54 [-0.76, -0.33]                                            | Large       | 0.19             | 93%                | < 0.001                           |
| Lymphocyte count           | 24                      | 1.5-4.0  | 10 <sup>9</sup> /L      | 4077                 | 4094                 | -0.51 [-0.69, -0.33]                                            | Large       | 0.15             | 90%                | < 0.001                           |
| Eosinophil count           | 8                       | 0.04-0.4 | 10 <sup>9</sup> /L      | 1288                 | 1858                 | -1.03 [-1.63, -0.43]                                            | Large       | 0.72             | 98%                | < 0.001                           |
| Platelet count             | 16                      | 150-450  | 10 <sup>9</sup> /L      | 2796                 | 3162                 | -0.48 [-0.76, -0.20]                                            | Medium      | 0.29             | 95%                | < 0.001                           |
| Lactate dehydrogenase      | 12                      | 135-225  | U/L                     | 1286                 | 976                  | 0.33 [-0.15, 0.80]                                              | Medium      | 0.63             | 95%                | < 0.001                           |
| Aspartate aminotransferase | 10                      | 0-40     | U/L                     | 901                  | 715                  | 0.38 [0.16, 0.59]                                               | Medium      | 0.07             | 70%                | < 0.001                           |
| Alanine aminotransferase   | 12                      | 0-40     | U/L                     | 941                  | 812                  | 0.39 [0.10, 0.69]                                               | Medium      | 0.21             | 86%                | < 0.001                           |
| Total bilirubin            | 7                       | <21      | umol/L                  | 1784                 | 1194                 | -0.27 [-0.51, -0.03]                                            | Medium      | 0.07             | 78%                | < 0.001                           |
| Albumin                    | 6                       | 35-50    | g/L                     | 591                  | 416                  | -0.21 [-0.65, 0.23]                                             | Medium      | 0.26             | 89%                | < 0.001                           |
| C-Reactive Protein         | 21                      | <5       | mg/L                    | 3454                 | 2879                 | 0.08 [-0.17, 0.33]                                              | Small       | 0.28             | 94%                | 0.54                              |
| Procalcitonin              | 7                       | <0.05    | ng/mL                   | 1754                 | 1161                 | -0.17 [-1.02, 0.67]                                             | Small       | 1.25             | 98%                | 0.69                              |
| Creatinine                 | 9                       | 45-104   | umol/L                  | 1801                 | 1290                 | -0.12 [-0.34, 0.11]                                             | Small       | 0.07             | 77%                | < 0.001                           |
| Blood urea nitrogen        | 3                       | 2.5-7.8  | mmol/L                  | 484                  | 295                  | 0.05 [-1.09, 1.19]                                              | Small       | 0.98             | 98%                | < 0.001                           |

|                    |   |      |      |      |      |                    |        |      |     |         |
|--------------------|---|------|------|------|------|--------------------|--------|------|-----|---------|
| <b>D-Dimer FEU</b> | 7 | <0.1 | mg/L | 1760 | 1168 | 0.22 [-0.17, 0.57] | Medium | 0.19 | 91% | < 0.001 |
|--------------------|---|------|------|------|------|--------------------|--------|------|-----|---------|

U/L = units per litre, CI = confidence interval, IV = weighted mean difference.
