# Supplementary material for: Utility of Routine Laboratory Biomarkers to Detect COVID-19: A Systematic Review and Meta-Analysis
Source: MDPI journal article supplement (doi:10.3390/v13050803), 2021-04-30
Supplement: s1 [file s1]

Table S4: Basic characteristics of included studies

| Study                     | Title                                                                                                                                 | Publication date | Country | Study site                                                                  | Study period                       | Sample size | Confirmed positive cases [%] | COVID-19   |          | Non-COVID-19 |          | Comments  |
|---------------------------|---------------------------------------------------------------------------------------------------------------------------------------|------------------|---------|-----------------------------------------------------------------------------|------------------------------------|-------------|------------------------------|------------|----------|--------------|----------|-----------|
|                           |                                                                                                                                       |                  |         |                                                                             |                                    |             |                              | Age        | Male [%] | Age          | Male [%] |           |
| <b>Brinati et al. [1]</b> | Detection of COVID-19 Infection from Routine Blood Exams with Machine Learning: A Feasibility Study                                   | 01/07/2020       | Italy   | IRCCS San Raffaele Hospital (Milan, Italy)                                  | end of Feb 2020 to mid of Mar 2020 | 279         | 63.4%                        | 62.6±16.3  | 48.4     | 59.2±21.7    | 18.9     | PUBLISHED |
| <b>Chen, et al. [2]</b>   | A diagnostic model for coronavirus disease 2019 (COVID-19) based on radiological semantic and clinical features: a multi-center study | 16/04/2020       | China   | 5 independent hospitals from 4 cities (Huizhou, Shantou, Yongzhou, Meizhou) | Jan 1 to Feb 8, 2020               | 136         | 51%                          | 42.9±13.3  | 59       | 46.7±25      | 65       | PUBLISHED |
| <b>Chen, et al. [3]</b>   | Differences Between COVID-19 and Suspected Then Confirmed SARS-CoV-                                                                   | 01/04/2020       | China   | Chongqing Three Gorges Central                                              | Jan 23 to Feb 5, 2020              | 104         | 75%                          | 45 [15-79] | 50       | 61[28-95]    | 50       | PUBLISHED |

|                                    |                                                                                                                                  |            |        |                                                         |                        |     |      |             |      |             |      |           |
|------------------------------------|----------------------------------------------------------------------------------------------------------------------------------|------------|--------|---------------------------------------------------------|------------------------|-----|------|-------------|------|-------------|------|-----------|
|                                    | 2-negative Pneumonia: A Retrospective Study From a Single Center                                                                 |            |        | Hospital, Chongqing                                     |                        |     |      |             |      |             |      |           |
| <b>Cheng, et al. [4]</b>           | Clinical Features and Chest CT Manifestations of Coronavirus Disease 2019 (COVID-19) in a Single-Center Study in Shanghai, China | 27/02/2020 | China  | Ruijin Hospital, Shanghai                               | Jan 19 to Feb 6, 2020  | 33  | 33%  | 50.36±15.50 | 72.7 | 43.59±16.02 | 31.8 | PUBLISHED |
| <b>Chi et al. [5]</b>              | Differential diagnosis for suspected cases of coronavirus disease 2019: a retrospective study                                    | 18/09/2020 | China  | Wenzhou Central Hospital                                | Jan 21 to Feb 20, 2020 | 68  | 25%  | 53.5±13.4   | 52.9 | 41.3±17.9   | 66.7 | PUBLISHED |
| <b>de Moraes Batista et al.[6]</b> | COVID-19 diagnosis prediction in emergency care patients: a machine learning approach                                            | 14/04/2020 | Brazil | Hospital Israelita Albert Einstein in São Paulo, Brazil | Mar 17 to Mar 30, 2020 | 235 | 43.0 | 49.4±14.5   | 65.7 | 48±16.6     | 39.8 | PRE-PRINT |
| <b>Fan et al. [7]</b>              | Association Between ABO Blood Group System and                                                                                   | 21/07/2020 | China  | Zhongnan Hospital of                                    | Jan 1 to Mar 5, 2020   | 208 | 51%  | 56.8±18.3   | 52.4 | 54.0±15.0   | 54.4 | PUBLISHED |

|                           |                                                                                                                                |            |       |                                                                      |                        |     |      |                  |      |                |      |           |
|---------------------------|--------------------------------------------------------------------------------------------------------------------------------|------------|-------|----------------------------------------------------------------------|------------------------|-----|------|------------------|------|----------------|------|-----------|
|                           | COVID-19 Susceptibility in Wuhan                                                                                               |            |       | Wuhan University                                                     |                        |     |      |                  |      |                |      |           |
| <b>Fei et al.[8]</b>      | Clinical laboratory characteristics in patients with suspected COVID-19: one single institution experience                     | 18/09/2020 | US    | University of Alabama at Birmingham                                  | Mar 28 to Jun 27, 2020 | 50  | 48%  | 65.4±9.6         | 62.5 | 56.3±14.0      | 46.2 | PUBLISHED |
| <b>Feng, et al. [9]</b>   | A Novel Triage Tool of Artificial Intelligence Assisted Diagnosis Aid System for Suspected COVID-19 Pneumonia in Fever Clinics | 20/03/2020 | China | Chinese People's Liberation Army General Hospital (PLAGH) in Beijing | Jan 14 to Feb 26, 2020 | 164 | 20%  | 39[37-41.5]      | 71.4 | 40[32.5-54.5]  | 63.2 | PRE-PRINT |
| <b>Ferrari et al.[10]</b> | Routine blood tests as a potential diagnostic tool for COVID-19                                                                | 06/07/2020 | Italy | San Raffaele Hospital (Milan, Italy)                                 | Feb 20 to Mar 20, 2020 | 207 | 50.7 | 61.8 ± 16.4      | 70.5 | 59.2 ± 21.7    | 52   | PUBLISHED |
| <b>Gao et al.[11]</b>     | Improving the early diagnosis of suspected patients with COVID-19: a                                                           | 30/06/2020 | China |                                                                      | Jan 29 to Feb 21, 2020 | 106 | 50%  | 43.5 (33.0-55.8) | 47.1 | 30 (21.5-40.5) | 66   | PUBLISHED |

|                              |                                                                                                                                                            |            |                 |                                           |                        |     |     |           |      |           |    |           |
|------------------------------|------------------------------------------------------------------------------------------------------------------------------------------------------------|------------|-----------------|-------------------------------------------|------------------------|-----|-----|-----------|------|-----------|----|-----------|
|                              | retrospective study of 106 patients                                                                                                                        |            |                 |                                           |                        |     |     |           |      |           |    |           |
| <b>Han, et al. [12]</b>      | Prominent Changes in Blood Coagulation of Patients With SARS-CoV-2 Infection                                                                               | 16/03/2020 | China           | Renmin Hospital, Wuhan                    | Jan 31 to Feb 10, 2020 | 134 | 70% | N/A       | 51   | N/A       | 70 | PUBLISHED |
| <b>Hsieh, et al. [13]</b>    | Featuring COVID-19 Cases via Screening Symptomatic Patients With Epidemiologic Link During Flu Season in a Medical Center of Central Taiwan                | 13/03/2020 | Taiwan          | China Medical University Hospital, Taiwan | Jan 20 to Feb 19, 2020 | 43  | 5%  | 45(39-51) | 50   | 34(3-68)  | 39 | PUBLISHED |
| <b>Huang, et al. [14]</b>    | A novel risk score to predict diagnosis with Coronavirus Disease 2019 (COVID-19) in suspected patients: A retrospective, multi-center, observational study | 08/06/2020 | China           | West China Hospital of Sichuan University | Jan 21 to Feb 7, 2020  | 475 | 71% | 43[32-54] | 54   | 34[26-49] | 59 | PUBLISHED |
| <b>Kurstjens et al. [15]</b> | Rapid identification of SARS-CoV-2-infected patients at the emergency                                                                                      | 29/06/2020 | the Netherlands | multicentre                               | Feb 27, 2020 onwards   | 967 | 69% | 70 ± 12   | 64.1 | 62 ± 16   | 43 | PUBLISHED |

|                           |                                                                                                                                                                           |            |       |                                                    |                        |      |     |              |      |             |      |           |
|---------------------------|---------------------------------------------------------------------------------------------------------------------------------------------------------------------------|------------|-------|----------------------------------------------------|------------------------|------|-----|--------------|------|-------------|------|-----------|
|                           | department using routine testing                                                                                                                                          |            |       |                                                    |                        |      |     |              |      |             |      |           |
| <b>Li, et al. [16]</b>    | Eosinopenia and elevated C-reactive protein facilitate triage of COVID-19 patients in fever clinic: A retrospective case-control study                                    | 25/05/2020 | China | Fever Clinic at Wuhan Union Hospital, Wuhan, China | Jan 31 to Feb 21, 2020 | 3323 | 14% | 59.5 [48-68] | 44.3 | 50.0[37-62] | 44.8 | PUBLISHED |
| <b>Li, et al. [17]</b>    | Comparison of the clinical characteristics between RNA positive and negative patients clinically diagnosed with 2019 novel coronavirus pneumonia                          | 23/02/2020 | China | Wuhan Fourth Hospital                              | Jan to Feb, 2020       | 54   | 57% | 54±13        | 48   | 49±12       | 30   | PUBLISHED |
| <b>Liang, et al. [18]</b> | Prevalence and clinical features of 2019 novel coronavirus disease (COVID-19) in the Fever Clinic of a teaching hospital in Beijing: a single-center, retrospective study | 28/02/2020 | China | Peking University Third Hospital, Beijing          | Jan 21 to Feb 15, 2020 | 88   | 24% | 42 [34.5-66] | 52.4 | N/A         | N/A  | PRE-PRINT |

|                             |                                                                                                              |            |       |                                                                                                                            |                        |     |     |                                                     |    |            |    |           |
|-----------------------------|--------------------------------------------------------------------------------------------------------------|------------|-------|----------------------------------------------------------------------------------------------------------------------------|------------------------|-----|-----|-----------------------------------------------------|----|------------|----|-----------|
| <b>Luo, et al. [19]</b>     | CT differential diagnosis of COVID-19 and non-COVID-19 in symptomatic suspects: a practical scoring method   | 07/05/2020 | China | Shenzhen Hospital                                                                                                          | Jan 10 to Feb 28, 2020 | 91  | 33% | 54 [36-64]                                          | 47 | 37[32-47]  | 54 | PUBLISHED |
| <b>Ma et al.[20]</b>        | Development and validation of a risk stratification model for screening suspected cases of COVID-19 in China | 31/07/2020 | China | First Affiliated Hospital, College of Medicine, Zhejiang University and Taizhou Enze Medical Center (Group), Enze Hospital | Jan 23 to Feb, 2020    | 523 | 11% | 47 (38-56)                                          | 66 | 32 (23-42) | 52 | PUBLISHED |
| <b>Mardani, et al. [21]</b> | Laboratory Parameters in Detection of COVID-19 Patients with Positive RT-PCR; a Diagnostic Accuracy Study    | 04/04/2020 | Iran  | Behpooyan Clinic Medical Center, Tehran                                                                                    | Feb 22 to Mar 14, 2020 | 200 | 35% | Pooled data reported: 41.3± 14.6 [19-78] (53% male) |    |            |    | PUBLISHED |

|                                   |                                                                                                                                                                                             |            |           |                                              |                              |      |     |             |       |                |       |           |
|-----------------------------------|---------------------------------------------------------------------------------------------------------------------------------------------------------------------------------------------|------------|-----------|----------------------------------------------|------------------------------|------|-----|-------------|-------|----------------|-------|-----------|
| <b>Martín-Sánchez et al.[22]*</b> | Diagnostic groups and short-term outcomes in suspected COVID-19 cases treated in an emergency department                                                                                    | 11/06/2020 | Spain     | Hospital Clínico San Carlos in Madrid, Spain | Feb 28 to Mar 31, 2020       | 1993 | 59% | 57.8±19.3   | 48    | 50.7±20.2      | 37.4  | PUBLISHED |
| <b>Mei et al.[0.]</b>             | Artificial intelligence-enabled rapid diagnosis of COVID-19 patients                                                                                                                        | 19/05/2020 | China     | multicentre                                  | Jan 17 to Mar 3, 2020        | 905  | 46% | 43.0 ± 16.4 | 49.8  | 38.6 ± 16.3    | 57.6  | PUBLISHED |
| <b>Meng et al. [24]</b>           | Development and utilization of an intelligent application for aiding COVID-19 diagnosis                                                                                                     | 21/03/2020 | China     | West China Hospital, Sichuan                 | Dec 20, 2019 to Feb 10, 2020 | 620  | 49% | 46±55.73    | 68.93 | 68.5±77.8<br>1 | 72.59 | PRE-PRINT |
| <b>O'Reilly, et al. [25]</b>      | Epidemiology and clinical features of emergency department patients with suspected COVID -19: Initial results from the COVID-19 Emergency Department Quality Improvement Project (COVED -1) | 07/05/2020 | Australia | The Alfred Emergency and Trauma Centre       | Apr 1 to Apr 14, 2020        | 240  | 5%  | 51±18       | 73    | 61±21          | 55    | PUBLISHED |

|                           |                                                                                                                                                      |            |       |                                                                  |                        |     |      |             |      |             |      |           |
|---------------------------|------------------------------------------------------------------------------------------------------------------------------------------------------|------------|-------|------------------------------------------------------------------|------------------------|-----|------|-------------|------|-------------|------|-----------|
| <b>Peng, et al. [26]</b>  | Improved Early Recognition of Coronavirus Disease-2019 (COVID-19): Single-Center Data From a Shanghai Screening Hospital                             | 01/04/2020 | China | Zhoupu Hospital, Shanghai                                        | Jan 23 to Feb 16, 2020 | 86  | 13%  | 40.73±11.32 | 45.5 | 39.67±13.90 | 45.3 | PUBLISHED |
| <b>Peng, et al. [27]</b>  | Artificial intelligence application in COVID-19 diagnosis and prediction                                                                             | 27/02/2020 | China | Taizhou Public Hygiene in Taizhou Hospital, of Zhejiang province | Jan 17 to Feb 1, 2020  | 117 | 27%  | 43[34-55]   | 65.6 | 39[23-49]   | 56.5 | PRE-PRINT |
| <b>Pisapia et al.[28]</b> | Differences among confirmed and not-confirmed COVID-19 patients at "D.Cotugno" hospital, Naples (Italy): what we learned from first suspected cases? | 01/06/2020 | Italy | "D. Cotugno" Hospital in Naples                                  | Feb 10 to Mar 10, 2020 | 37  | 56%  | 49±58       | 65   | 29±11       | 65   | PUBLISHED |
| <b>Qin et al. [29]</b>    | A predictive model and scoring system combining clinical and CT                                                                                      | 01/07/2020 | China | Shanghai Municipal CDC                                           | Jan 19 to Feb 6, 2020  | 168 | 52.4 | 47.3 ± 12.4 | 47.7 | 42.8 ± 17.3 | 37.5 | PUBLISHED |



|                                |                                                                                                      |            |        |                                                       |                        |     |     |             |      |            |      |           |
|--------------------------------|------------------------------------------------------------------------------------------------------|------------|--------|-------------------------------------------------------|------------------------|-----|-----|-------------|------|------------|------|-----------|
|                                | characteristics for the diagnosis of COVID-19                                                        |            |        |                                                       |                        |     |     |             |      |            |      |           |
| <b>Santotoribio et al.[30]</b> | Evaluation of Routine Blood Tests for Diagnosis of Suspected Coronavirus Disease 2019                | 09/09/2020 | Spain  | Virgen del Rocio University Hospital (Seville, Spain) | Mar 26 to Apr 8, 2020  | 203 | 46% | 64.6±14.9   | 53.2 | 58.5±18.7  | 47.7 | PUBLISHED |
| <b>Song, et al. [31]</b>       | COVID-19 early warning score: a multi-parameter screening tool to identify highly suspected patients | 08/03/2020 | China  | First Affiliated Hospital, Zhejiang                   | Jan 20 to Feb 5, 2020  | 304 | 30% | 53[43.5-62] | 63   | 34[29-49]  | 37   | PRE-PRINT |
| <b>Tordjman, et al. [32]</b>   | Pre-test probability for SARS-Cov-2-related Infection Score: the PARIS score                         | 17/12/2020 | France | ED at Cochin Hospital (Paris, France)                 | Mar 15 to 5 Apr, 2020  | 112 | 45% | 60.8±18.1   | 30   | 54.1±18.6  | 25   | PUBLISHED |
| <b>Vieceli et al.[33]</b>      | A predictive score for COVID-19 diagnosis using clinical, laboratory and chest image data            | 30/07/2020 | Brazil | Hospital de Clínicas de Porto Alegre                  | Mar 17 to Apr 10, 2020 | 100 | 29% | 62 (56–69)  | 51.7 | 54 (34–68) | 39.4 | PUBLISHED |
| <b>Wang, et al. [34]</b>       | Development and Validation of a Diagnostic Nomogram                                                  | 06/04/2020 | China  | PRIMARY COHORT:                                       | Jan 25 to Mar 3, 2020  | 294 | 53% | 48.4±12.4   | 61   | 50±17.6    | 43   | PRE-PRINT |

|                 |                                                                               |            |       |                                                                                                                                                                                                                                |                 |     |     |           |      |                                  |      |           |
|-----------------|-------------------------------------------------------------------------------|------------|-------|--------------------------------------------------------------------------------------------------------------------------------------------------------------------------------------------------------------------------------|-----------------|-----|-----|-----------|------|----------------------------------|------|-----------|
|                 | to Predict COVID-19<br>Pneumonia                                              |            |       | Second<br>Affiliated<br>Hospital and<br>Yuying<br>Children's<br>Hospital of<br>Wenzhou<br>Medical<br>University<br>(Wenzhou,<br>China);<br>VALIDATIO<br>N COHORT:<br>People's<br>Hospital of<br>Yueqing<br>(Yueqing,<br>China) |                 |     |     |           |      |                                  |      |           |
| Wu, et al. [35] | Rapid and accurate<br>identification of COVID-19<br>infection through machine | 06/04/2020 | China | Lanzhou<br>Pulmonary<br>Hospital, the<br>First                                                                                                                                                                                 | Not<br>reported | 253 | 42% | 47[33-64] | 51.9 | PNEUM<br>ONIA:<br>63[47-<br>75], | 52.7 | PRE-PRINT |

|                         |                                                                                        |            |       |                                                                                                                                                |                       |    |     |           |      |                                                   |    |           |
|-------------------------|----------------------------------------------------------------------------------------|------------|-------|------------------------------------------------------------------------------------------------------------------------------------------------|-----------------------|----|-----|-----------|------|---------------------------------------------------|----|-----------|
|                         | learning based on clinical available blood test results                                |            |       | Hospital of Lanzhou University, Lanzhou University Second Hospital, the First People's Hospital of Lanzhou City, and Gansu Provincial Hospital |                       |    |     |           |      | TUBERC OLOSIS: 54[33-68], LUNG CANCE R: 61[54-69] |    |           |
| <b>Zhao, et al.[36]</b> | A Comparative Study on the Clinical Features of COVID-19 Pneumonia to Other Pneumonias | 12/03/2020 | China | Second Affiliated Hospital of Anhui Medical University and Suzhou Municipal                                                                    | Jan 23 to Feb 5, 2020 | 34 | 56% | 48[27-56] | 57.9 | 35[27-46]                                         | 40 | PUBLISHED |

|                         |                                                                                                                      |            |       |                                                  |                        |     |     |           |      |             |      |           |
|-------------------------|----------------------------------------------------------------------------------------------------------------------|------------|-------|--------------------------------------------------|------------------------|-----|-----|-----------|------|-------------|------|-----------|
|                         |                                                                                                                      |            |       | Hospital,<br>Anhui                               |                        |     |     |           |      |             |      |           |
| <b>Zhao, et al.[37]</b> | A comparative study of the laboratory features of COVID-19 and other viral pneumonias in the recovery stage          | 21/07/2020 | China | Xi'an Chest Hospital (Shaanxi Province of China) | Jan 31 to Apr 3, 2020  | 93  | 50% | 52(35-63) | 40.4 | 42(31-56.5) | 53.3 | PUBLISHED |
| <b>Zhu, et al. [38]</b> | Initial clinical features of suspected coronavirus disease 2019 in two emergency departments outside of Hubei, China | 13/03/2020 | China | The First Affiliated Hospital of USTC, Hefei     | Jan 24 to Feb 20, 2020 | 116 | 28% | 46[35-52] | 47   | 35[27-53]   | 46   | PUBLISHED |

Legend: \*not in English
