# Supplementary material for: Utility of Routine Laboratory Biomarkers to Detect COVID-19: A Systematic Review and Meta-Analysis
Source: MDPI journal article supplement (doi:10.3390/v13050803), 2021-04-30
Supplement: s1 [file s1]

Table S5: Quality assessment - Risk of Bias, modified QUADAS2 tool

|                             | Patient selection |         |     |         |     |     | Testing       |         |         | Flow and timing |     |       | Overall risk of bias |
|-----------------------------|-------------------|---------|-----|---------|-----|-----|---------------|---------|---------|-----------------|-----|-------|----------------------|
| Study                       | Q1                | Q2      | Q3  | Q4      | Q5  | Q6  | Q7            | Q8      | Q9      | Q10             | Q11 | Total |                      |
| Brinati et al. [1]          | Yes               | Yes     | Yes | Yes     | Yes | No  | No thresholds | Unclear | Yes     | Unclear         | Yes | 7     | Low                  |
| Chen, et al. [2]            | Yes               | No      | Yes | Yes     | Yes | No  | No            | Yes     | Yes     | Yes             | Yes | 8     | Low                  |
| Chen, et al. [3]            | Unclear           | No      | Yes | Yes     | Yes | No  | No            | Yes     | Unclear | Yes             | Yes | 6     | High                 |
| Cheng, et al. [4]           | Yes               | Yes     | Yes | Yes     | Yes | No  | No            | Yes     | Yes     | Yes             | Yes | 9     | Low                  |
| Chi et al. [5]              | Unclear           | No      | Yes | Unclear | Yes | No  | No thresholds | Yes     | Yes     | Unclear         | Yes | 5     | High                 |
| de Moraes Batista et al.[6] | Yes               | Yes     | Yes | Yes     | Yes | No  | No thresholds | Yes     | Yes     | Yes             | Yes | 9     | Low                  |
| Fan et al. [7]              | No                | No      | Yes | No      | No  | No  | No thresholds | No      | No      | Unclear         | Yes | 2     | High                 |
| Fei et al.[8]               | Yes               | No      | Yes | No      | Yes | No  | No thresholds | Yes     | Yes     | Yes             | Yes | 7     | Low                  |
| Feng, et al. [9]            | Yes               | Yes     | Yes | Yes     | No  | No  | Yes           | Yes     | Yes     | Yes             | Yes | 9     | Low                  |
| Ferrari et al.[10]          | Yes               | No      | Yes | No      | Yes | No  | No thresholds | Yes     | Yes     | Yes             | Yes | 7     | Low                  |
| Gao et al.[11]              | Yes               | Yes     | Yes | Yes     | Yes | Yes | No thresholds | Yes     | Yes     | Yes             | Yes | 9     | Low                  |
| Han, et al. [12]            | Yes               | Yes     | Yes | Yes     | Yes | No  | Yes           | Yes     | Yes     | Yes             | Yes | 10    | Low                  |
| Hsieh, et al. [13]          | Unclear           | Unclear | No  | No      | Yes | No  | Yes           | Yes     | Yes     | Yes             | Yes | 6     | High                 |
| Huang, et al. [14]          | Yes               | Yes     | Yes | Unclear | Yes | No  | No thresholds | Yes     | Yes     | Yes             | Yes | 8     | Low                  |
| Kurstjens et al. [15]       | Yes               | No      | No  | No      | No  | No  | Yes           | Yes     | Yes     | Yes             | Yes | 6     | High                 |
| Li, et al. [16]             | No                | No      | Yes | Yes     | Yes | No  | No thresholds | Yes     | Yes     | Yes             | Yes | 7     | Low                  |

|                            |         |         |     |         |     |         |               |         |         |         |     |   |      |
|----------------------------|---------|---------|-----|---------|-----|---------|---------------|---------|---------|---------|-----|---|------|
| Li, et al. [17]            | No      | No      | Yes | Yes     | Yes | No      | No            | Yes     | Yes     | Yes     | Yes | 7 | Low  |
| Liang, et al. [18]         | Yes     | Yes     | No  | No      | No  | No      | No thresholds | Yes     | Yes     | Yes     | Yes | 6 | High |
| Luo, et al. [19]           | Yes     | Yes     | Yes | Yes     | No  | No      | No thresholds | No      | Yes     | Yes     | No  | 6 | High |
| Ma et al.[20]              | Unclear | Yes     | Yes | Yes     | Yes | No      | No            | Yes     | Unclear | Unclear | Yes | 6 | High |
| Mardani, et al. [21]       | Yes     | Yes     | Yes | Yes     | Yes | No      | No thresholds | Yes     | Yes     | Yes     | Yes | 9 | Low  |
| Martín-Sánchez et al.[22]* | Yes     | Unclear | Yes | Unclear | Yes | No      | No thresholds | Yes     | Yes     | Yes     | Yes | 7 | Low  |
| Mei et al.[0.]             | No      | No      | Yes | Yes     | Yes | No      | No thresholds | Yes     | Yes     | Yes     | Yes | 7 | Low  |
| Meng et al. [24]           | Yes     | No      | Yes | Yes     | Yes | No      | No thresholds | Yes     | Yes     | Unclear | Yes | 7 | Low  |
| O'Reilly, et al. [25]      | Yes     | Yes     | Yes | No      | Yes | Unclear | No            | Yes     | Yes     | Yes     | Yes | 8 | Low  |
| Peng, et al. [26]          | Yes     | Yes     | Yes | Yes     | Yes | No      | No            | Yes     | Yes     | Yes     | Yes | 9 | Low  |
| Peng, et al. [27]          | No      | No      | Yes | Yes     | Yes | No      | No thresholds | Yes     | Yes     | Yes     | Yes | 7 | Low  |
| Pisapia et al.[28]         | Yes     | Yes     | Yes | No      | Yes | No      | No thresholds | Yes     | Yes     | Yes     | Yes | 8 | Low  |
| Qin et al. [29]            | Unclear | Yes     | Yes | No      | Yes | No      | No thresholds | Unclear | Yes     | Yes     | Yes | 6 | High |
| Santotoribio et al.[30]    | Yes     | Yes     | Yes | No      | Yes | No      | No thresholds | Yes     | Yes     | Yes     | Yes | 8 | Low  |
| Song, et al. [31]          | Yes     | Yes     | Yes | No      | Yes | No      | No            | Yes     | Yes     | Yes     | Yes | 8 | Low  |
| Tordjman, et al. [32]      | Yes     | No      | Yes | Yes     | Yes | Yes     | No            | Yes     | Yes     | Yes     | Yes | 8 | Low  |
| Vieceli et al.[33]         | Yes     | Yes     | Yes | No      | Yes | No      | No thresholds | Yes     | Yes     | Yes     | Yes | 8 | Low  |
| Wang, et al. [34]          | Unclear | Unclear | Yes | Yes     | Yes | No      | No thresholds | Yes     | Yes     | Yes     | Yes | 7 | Low  |
| Wu, et al. [35]            | No?     | No?     | Yes | Unclear | Yes | No      | No thresholds | Yes     | Yes     | Yes     | Yes | 6 | High |
| Zhao, et al.[36]           | Unclear | Unclear | Yes | Yes     | Yes | No      | No            | Yes     | Yes     | Unclear | Yes | 6 | High |

|                  |         |     |     |     |     |    |               |     |     |         |     |   |      |
|------------------|---------|-----|-----|-----|-----|----|---------------|-----|-----|---------|-----|---|------|
| Zhao, et al.[37] | Unclear | No  | Yes | No  | Yes | No | No thresholds | No  | Yes | Unclear | No  | 3 | High |
| Zhu, et al. [38] | Yes     | Yes | Yes | Yes | Yes | No | No            | Yes | Yes | Yes     | Yes | 9 | Low  |

**Footnotes: Risk of bias questions:** **Q1.** Was a consecutive or random sample of patients enrolled? **Q2.** Was a case-control design avoided? **Q3.** Were laboratory findings recorded for all patients (not only for a specific subgroup)? **Q4.** Did the study avoid inappropriate exclusions? **Q5.** Were they testing only patients 'suspected COVID-19'? **Q6.** Is the reference standard likely to correctly classify the target condition? Use NO if they did not use the composite reference standard (RT-PCR+ imaging). **Q7.** If thresholds were used, were they equivalent to normal ranges for that test? **Q8.** Was the conduct or interpretation of the tests unbiased? **Q9.** Were tests performed at the same point in time for all patients in the sample? (eg. on admission) **Q10.** Were biomarker tests performed prior to COVID-19 treatment (including drugs)? **Q11.** Are the criteria for categorisation of patients clear and defined?
