# Supplementary material for: Utility of Routine Laboratory Biomarkers to Detect COVID-19: A Systematic Review and Meta-Analysis
Source: Viruses. 2021 Apr 30;13(5):803. doi: 10.3390/v13050803 (PMC8147047; doi:10.3390/v13050803)
Supplement: Supplementary file 1 [file viruses-13-00803-s001.zip]

Archive with 8 entries (8 files):
- Table S1 Extraction table.pdf
- Table S2 Quality assessment - Risk of Bias, modified QUADAS2 tool.pdf
- Table S3 PRISMA Checklist.pdf
- Table S4 Basic characteristics of included studies revised.pdf
- Table S5 Statistical analysis.pdf
- Table S6 Meta-analysis.pdf
- Table S7 Sensitivity analysis Low risk of bias.pdf
- Table S8 Sensitivity analysis Published studies.pdf
